1 **Sonogenetic stimulation of the brain at a spatiotemporal resolution suitable for vision**  
2 **restoration**

3

4 S. Cadoni<sup>1</sup>, C. Demené<sup>2</sup>, M. Provansal<sup>1</sup>, D. Nguyen<sup>1</sup>, D. Nelidova<sup>3</sup>, G. Labernede<sup>1</sup>, I. Alcalá<sup>1</sup>, J.  
5 Lubetzki<sup>1</sup>, R. Goulet<sup>1</sup>, E. Burban<sup>1</sup>, J. Dégardin<sup>1</sup>, M. Simonutti<sup>1</sup>, G. Gauvain<sup>1</sup>, F. Arcizet<sup>1</sup>, O.  
6 Marre<sup>1</sup>, D. Dalkara<sup>1</sup>, B. Roska<sup>3</sup>, J. A. Sahel<sup>1,4,5,6</sup>, M. Tanter<sup>2\*</sup>, S. Picaud<sup>1\*</sup>

7

8 **Affiliation:**

9 <sup>1</sup>Sorbonne Université, INSERM, CNRS, Institut de la Vision, 17 rue Moreau, F-75012 Paris,  
10 France;

11 <sup>2</sup>Physics for Medicine Paris, INSERM, CNRS, École Supérieure de Physique et de Chimie  
12 Industrielles (ESPCI Paris), Paris Sciences et Lettes (PSL) Research University, 75012 Paris,  
13 France;

14 <sup>3</sup>Institute of Molecular and Clinical Ophthalmology Basel, Basel, Switzerland;

15 <sup>4</sup>Department of Ophthalmology, The University of Pittsburgh School of Medicine, Pittsburgh,  
16 PA 15213, United States;

17 <sup>5</sup>Department of Ophthalmology and Vitreo-Retinal Diseases, Fondation Ophtalmologique  
18 Rothschild, F-75019 Paris, France;

19 <sup>6</sup>Centre Hospitalier National d'Ophtalmologie des XV-XX, F-75012 Paris.

20 \*These authors contributed equally to this work.

21

22

23

24 Abstract

25 Remote, precisely controlled activation of the brain is a fundamental challenge in the  
26 development of brain-machine interfaces providing feasible rehabilitation strategies for  
27 neurological disorders. Low-frequency ultrasound stimulation can be used to modulate  
28 neuronal activity deep in the brain<sup>1-7</sup>, but this approach lacks spatial resolution and cellular  
29 selectivity and loads the brain with high levels of acoustic energy. The combination of the  
30 expression of ultrasound-sensitive proteins with ultrasound stimulation ('sonogenetic  
31 stimulation') can provide cellular selectivity and higher sensitivity, but such strategies have  
32 been subject to severe limitations in terms of spatiotemporal resolution *in vivo*<sup>8-10</sup>,  
33 precluding their use for real-life applications. We used the expression of large-conductance  
34 mechanosensitive ion channels (MscL) with high-frequency ultrasonic stimulation for a  
35 duration of milliseconds to activate neurons selectively at a relatively high spatiotemporal  
36 resolution in the rat retina *ex vivo* and the primary visual cortex of rodents *in vivo*. This  
37 spatiotemporal resolution was achieved at low energy levels associated with negligible tissue  
38 heating and far below those leading to complications in ultrasound neuromodulation<sup>6,11</sup>. We  
39 showed, in an associative learning test, that sonogenetic stimulation of the visual cortex  
40 generated light perception. Our findings demonstrate that sonogenetic stimulation is  
41 compatible with millisecond pattern presentation for visual restoration at the cortical level.  
42 They represent a step towards the precise transfer of information over large distances to the  
43 cortical and subcortical regions of the brain via an approach less invasive than that  
44 associated with current brain-machine interfaces and with a wide range of applications in  
45 neurological disorders.

46

47 It was anticipated that brain-machine interfaces (BMIs) based on multi-electrode  
48 arrays would provide solutions for many neurological disorders or deficits, including  
49 blindness<sup>12</sup>. Multi-electrode arrays have met with increasing success in peripheral sensory  
50 system rehabilitation strategies, for restoring hearing in the cochlea or sight in the retina, for  
51 example. The restoration of vision is, perhaps the most demanding challenge for BMIs, as it  
52 ultimately requires the video-rate transmission of complex spatial patterns of stimulation. In  
53 patients who have lost the eye-to-brain connection, great hopes have been raised for the  
54 restoration of sight by cortical multi-electrode arrays since early reports in the  
55 1960s<sup>13,14</sup>. However, a recent clinical study with surface cortical electrodes showed that form  
56 perception required sequential point-by-point stimulation for more than one second for  
57 letter recognition<sup>15</sup>. The cortical surface electrodes used (0.5 mm in diameter) had a wide  
58 spacing (2-4 mm), limiting pixel numbers<sup>15</sup> and precluding their use for complex tasks, such  
59 as navigation and face recognition. Studies in non-human primates have shown that  
60 stimulation deep within the visual cortex is much more efficient for eliciting perception with  
61 smaller currents<sup>16</sup>. With the use of penetrating electrodes, non-human primates were able  
62 to recognize letters following the static multi-point electrical stimulation of their visual  
63 cortex for only 167 ms<sup>17</sup>. The higher temporal resolution associated with this cortical vision  
64 strategy was achieved at the expense of invasiveness, due to the need for penetrating  
65 electrodes. Clinical trials with this technology are underway, but a loss of efficacy over time  
66 has already been reported<sup>14</sup>. Nevertheless, these results demonstrate the feasibility of visual  
67 restoration at the cortical level through stimulation deep within the cortex.

68  
69 Optogenetic therapy provides an alternative for the non-invasive stimulation of neurons at  
70 higher resolution, as demonstrated on the retina<sup>18-21</sup>. However, despite encouraging  
71 preliminary results in studies aiming to elicit visual perception at the cortical level<sup>22-24</sup>,  
72 approaches for optical stimulation of the cortex are hindered by the dura mater and by the  
73 scattering and absorption of light by tissues. Penetrating light guides have therefore been  
74 proposed as a means of maintaining the resolution of optical stimulation and its intensity  
75 within the brain after removal of the dura<sup>23-25</sup>. Ultrasound (US) waves could potentially  
76 overcome these limitations, making it possible to focus at depth and to achieve the non-  
77 invasive neuromodulation of cortical and subcortical areas of the brains<sup>1-7</sup>. The implantation  
78 of ultrasonic matrix arrays in a cranial window would provide a less invasive approach to

79 vision restoration, as the ultrasonic beam would propagate through the intact dura, the  
80 subdural and subarachnoid spaces (Fig. 1a). Unfortunately, existing US neuromodulation  
81 strategies are restricted to low-frequency transmissions, resulting in poor spatial resolution  
82 (>3 mm) and long-lasting responses. Indeed, attempts at high-frequency neuromodulation  
83 have resulted in high levels of acoustic energy<sup>26</sup>, with a risk of thermal heating<sup>8-10</sup> and US-  
84 mediated tissue damage<sup>6,11</sup>. This inevitable trade-off between spatial resolution and acoustic  
85 intensity has greatly limited the applicability of US neuromodulation for BMI. The  
86 sonogenetic therapy approach proposed here aims to solve this problem. The ultimate goal  
87 is the development of a technology that is less invasive than electrodes but capable of  
88 activating neurons in the visual cortex with a high spatial (~100  $\mu\text{m}$ ) and temporal (<50 ms)  
89 resolution. We propose 1) to boost neuronal sensitivity to US through the expression of US-  
90 sensitive channels on cell membranes<sup>8-10,27,28</sup>, 2) to demonstrate that it is possible to target a  
91 locally defined subset of neurons by gene therapy, which is not currently possible with non-  
92 specific US neuromodulation strategies, 3) to induce responses with a sufficiently high  
93 temporal precision and 4) to gain more than one order of magnitude in spatial resolution  
94 through the use of high-frequency US, which was previously considered impossible *in vivo*  
95 without considerably increasing acoustic intensities and potential adverse effects<sup>29</sup>. This  
96 activation of the brain with a unique combination of high spatial and temporal resolution,  
97 through the intact dura, could render sonogenetic therapy perfectly compatible with  
98 applications for vision restoration, which require video-rate patterns of stimulation.

99 With the aim of developing a suitable approach to demonstrate proof-of-concept for  
100 sonogenetic brain activation, we first characterized three focused ultrasonic transducers.  
101 Their dimensions and geometric foci were selected so as to provide a relevant model of  
102 future implanted matrix arrays for human applications and to be suitable for use in proof-of-  
103 concept experiments in rodents (Fig. 1b). Transducers were designed with a similar focal  
104 distance ( $F = 31.7$  mm for the lower frequency and  $F = 25.4$  mm for the two higher  
105 frequencies) and numerical apertures (diameter  $\varnothing = 25.4$ mm for the lower frequency and  $\varnothing$   
106  $= 12.7$  mm for the 2 higher frequencies, corresponding respectively to an aperture number  
107  $F/\varnothing = 1.25$  and 2 respectively), for the transmission of focused beams over different  
108 frequency ranges ( $f = 0.5$  MHz,  $f = 2.25$  MHz and  $f = 15$  MHz, corresponding to wavelengths  
109 of 3.0, 0.7 and 0.1 mm, respectively) (Fig. 1c-e). Increasing the frequency of ultrasound  
110 stimulation from 0.5 MHz (typical of neuromodulation) (Fig. 1c) to 15 MHz (Fig. 1e) has a

111 major impact on the resolution that can be achieved: in our case the volume of the focal  
112 spot and therefore of the stimulated locus is diminished by a factor  $\sim 4100$  when replacing  
113 the 0.5 MHz transducer by the 15 MHz transducer. We therefore performed most of our  
114 experiments at 15 MHz; the two lower frequencies were used for an initial comparison of  
115 efficiency and spatial resolution.

116 Before investigating cortical activation *in vivo*, we studied sonogenetic therapy in the  
117 retina, which serves as an easily accessible part of the central nervous system. In this natural  
118 mammalian neuronal circuit, we expressed the mechanosensitive ion channel of large  
119 conductance (MscL)<sup>30–34</sup> specifically in rat retinal ganglion cells (RGCs), with *in vivo*  
120 intravitreal delivery by an adeno-associated vector (AAV). Here, RGCs were simply used as a  
121 neuronal model suitable for the *ex vivo* screening of acoustic parameters for effective  
122 sonogenetic stimulation in a realistic neural circuit, avoiding potential US interference with  
123 the auditory system *in vivo*<sup>35,36</sup>. Vectors were produced with the MscL gene from *Escherichia*  
124 *coli* in its wild-type (WT) form and with a mutation, G22S<sup>37</sup>, which increased the sensitivity of  
125 cultured neurons to mechanical and ultrasonic stimulation<sup>34,38</sup>. An AAV2.7m8<sup>39</sup> serotype  
126 vector was used to encode the MscL channels fused to the red fluorescent protein  
127 tdTomato, under control of the SNCG promoter to target the RGC population specifically  
128 among the retinal neurons<sup>40</sup>. Following AAV injections, tdTomato expression was detected *in*  
129 *vivo*, on the eye fundus (Fig. 2a). Examination of the flat-mounted retina showed that  
130 tdTomato expression was restricted to the ganglion cell layer and the optic fiber bundles  
131 (Fig. E1b). We further demonstrated that expression was limited to RGCs, by labeling these  
132 cells with a specific antibody, RPBMS (Fig. 2b). Expression of the MscL gene seemed to be  
133 concentrated at the cell membrane on the soma and axon (Fig. 2c). The staining indicated  
134 that, in the transfected area, 33.73% and 45.83% of RPBMS-positive cells expressed  
135 tdTomato, for the MscL-WT and MscL-G22S proteins, respectively (Fig. 2d).

136 We then evaluated RGC sensitivity to US, by performing *ex vivo* recordings of the  
137 retina on a multi-electrode array (Fig. 2e). In retinas expressing the MscL channel, RGCs  
138 displayed strong and sustained ON responses to focused 15 MHz US stimulation (Fig. 2f-  
139 left). These responses were different from that recorded in non-transfected (NT) retinas, in  
140 which RGCs presented an increase in spiking activity after the start of the stimulus (Fig. 2f-  
141 right) with relatively long latencies,  $50.4 \pm 4.2$  ms (Fig. 2g). By contrast, many RGCs of  
142 transfected retinas presented responses with a very short latency,  $12.2 \pm 2.5$  ms, (Fig. 2f- left),

143 whereas others continued to respond with longer latencies (Fig. 2g). RGCs were classified  
144 into SL and LL in terms of their response, with SL corresponding to a latency of less than 45  
145 ms. Even if some RGCs of MscL-expressing retinas continued to respond with longer  
146 latencies, they presented a significantly shorter overall geometric mean latency, 24.35 ms  
147 (GSD: 6.06) than non-transfected RGCs, 46.62 ms (GSD: 1.42) ( $p < .0001$ , unpaired  $t$ -test on  
148 log-transformed values) (Fig E2c-d). The generation of SL ON US responses was not related  
149 to a specific RGC type (Fig. E2a), as they were measured both in cells with ON responses to  
150 light, and those with OFF responses to light (Fig. 2f-left). MscL expression decreased latency  
151 and increased the mean number of cells per retina responding to US (Fig. 2h). SL responding  
152 cells expressing MscL were sensitive at much lower US pressures than non-transfected cells  
153 and their number increased with increasing US pressures (Fig. 2i). SL US responses also  
154 involved higher firing rates and were more sustained than LL US responses (Fig. 2j).  
155 Moreover, we observed that the G22S mutation further enhanced the sensitivity of SL RGCs  
156 to lower US pressures (Fig. 2k).

157

158 We further investigated the origin of the sonogenetic responses, by adding a mixture of  
159 synaptic blockers (CNQX-LAP4-CPP) to the bath perfusing the retina. These synaptic blockers  
160 were found to abolish US responses in non-transfected retinas but not in MscL-transfected  
161 retinas, in which they did not suppress the SL US responses and only decreased the number  
162 of LL US responses (Fig. 2l, Fig E2c-d). This observation suggests that the MscL-mediated SL  
163 US responses are initiated by MscL-transfected RGCs, whereas LL US responses in the  
164 transfected and non-transfected retina originate upstream from RGCs. These conclusions  
165 were supported by data recorded with the retinas of blind P23H rats. No US responses were  
166 recorded for the non-transfected P23H retina (Fig. 2l), demonstrating that the LL US  
167 responses required synaptic transmission, as previously reported<sup>41</sup>, and suggesting a  
168 possible origin in photoreceptors. MscL-transfected P23H retinas displayed many SL US  
169 responses and few LL US responses, further demonstrating that MscL expression generates  
170 the SL responses in RGCs (Fig. 2l, Fig E2c-d). The residual LL responses for P23H and for  
171 blocker-bathed retinas may originate from RGCs with a lower level of MscL expression or  
172 from US wave reverberations in the recording chamber. The geometric mean latencies in all  
173 the MscL-tested groups were already very different from those for the non-transfected  
174 retina (Fig. E2c), but the cumulative distribution of latencies further highlighted these

175 differences between the non-transfected retina and the other tested conditions in terms of  
176 latency distribution (Fig. E2d). We subsequently restricted our analyses to SL US responses.  
177 We investigated the temporal kinetics of US responses under various durations of US  
178 stimulation (Fig. 3a) and at various repetition rates (Fig. 3b). Neurons responded to even  
179 very short stimulation durations (10 ms), with responses showing a fast return to the control  
180 level of activity (Fig. 3a). For longer stimuli (100 ms or longer), habituation began to occur,  
181 with a reduction of the maximum firing rate (Fig. 3c). US response durations were correlated  
182 with stimulus duration (Fig. 3d). Using a different repetition rate of a 15 MHz US stimulus,  
183 RGCs were able to follow the rhythm up to a stimulus repetition frequency of 10 Hz (Fig. 3b-  
184 e). The Fano factor in the previous experiments indicated that the response had a low  
185 variability in spike count and possibly high information content (Fig. 3c-e).

186 We then investigated whether different US frequencies (0.5, 2.25 and 15 MHz) affected the  
187 spatial resolution of the response, in accordance with the measured US pressure fields,  
188 which became smaller at higher US frequencies (Fig. 1b-d, Fig. E3). The features of the  
189 responses evoked by the different US frequencies were found to be similar (Fig. E2e-f).  
190 Figure 3f illustrates the distribution of responding cells on the recording chip under different  
191 US stimulation frequencies with the expected FWHM (full width at half maximum)  
192 distribution of the US pressure field (colored rings). Cells responding to US were widespread  
193 over the recorded area for 0.5 and 2.25 MHz, but appeared to be more confined for 15 MHz  
194 (Fig. 3f). For each stimulated retina, we then calculated the spatial dispersion of activated  
195 cells; this value decreased significantly from  $1.48 \pm 0.12$  mm and  $1.30 \pm 0.18$  mm at 0.5 MHz  
196 and 2.25 MHz, respectively, to  $0.59 \pm 0.03$  mm at 15 MHz (Fig. 3g). These distances were  
197 consistent with the size of the measured ultrasound pressure fields (Fig. 1c-e); for the 0.5  
198 MHz transducer, the focal spot of which was much larger than the MEA chip. This distance is  
199 close to the mean distance between randomly selected pairs of electrodes on the MEA chip  
200 (1.73 mm). The density of activated cells increased significantly with increasing US frequency  
201 and activated cells were more widely dispersed on the larger stimulated area at lower  
202 frequencies (Fig. 3h). US stimulation is more effective at higher frequencies, because lower  
203 acoustic power values are required to activate an equivalent number of cells. Indeed, even if  
204 the acoustic intensities at 2.25 and 15 MHz were quite similar, the acoustic power delivered  
205 was almost two orders of magnitude lower at 15 MHz (0.03 W) than at 2.25 MHz (0.82 W).  
206 Interestingly, at 15 MHz, the stimulated area was small enough for the focal spot of the US

207 probe to be moved above the isolated retina, triggering a shift in the responding cells (Fig.  
208 3i). This shift followed the probe's focal spot over the retina, in the same direction and with  
209 a consistent displacement amplitude. The center of the response was found to move in  
210 accordance with the displacement of the US transducer (Fig. 3j). These results demonstrate  
211 that our sonogenetic therapy approach can efficiently activate neurons with a millisecond  
212 and sub-millimetric precision.

213 Following this *ex vivo* demonstration on the retina, we then investigated whether the  
214 approach could also be applied to the brain *in vivo*, paving the way for a sonogenetic BMI  
215 using high frequency ultrasonic arrays implanted in the skull bone. As the G22S mutation  
216 enhanced the US sensitivity of RGCs *ex vivo*, we expressed this channel in the cortical  
217 neurons of the primary visual cortex (V1) in rats. We injected a AAV9.7m8 vector encoding  
218 the MscL-G22S channel fused to tdTomato under the control of the neuron-specific CamKII  
219 promoter into V1. TdTomato fluorescence was detected in the brain (Fig. 4a) and in cortical  
220 slices (Fig. 4b). V1 neurons expressed tdTomato, particularly in layer 4 (Fig. 4b). Staining with  
221 an anti-NeuN antibody showed that 33.4% of cortical neurons in the transfected area  
222 expressed tdTomato (Fig. 4c).

223 For investigation of the ability of a 15 MHz US stimulus to activate cortical neurons,  
224 we placed a micro-EcoG ( $\mu$ EcoG) electrode array on the cortical surface of V1 (Fig. 4d). In  
225 non-transfected (NT) animals, no US-evoked signal was recorded (Fig. 4e-right,  $n=3$  rats),  
226 whereas, in V1 expressing MscL-G22S, US stimulation of the cortical surface elicited large  
227 negative  $\mu$ EcoG potentials (Fig. 4e-middle,  $n=6$  rats). These US-evoked negative deflections  
228 were different from the recorded visual-evoked potentials, which presented typical P0, N1  
229 and P1 positive and negative deflections (Fig. 4e-left). The duration of the US responses was  
230 clearly related to the duration of the US stimulation (Fig. 4f). The amplitude of US-evoked  
231 potentials increased with both increasing US pressure (Fig. 4g) and increasing US stimulus  
232 duration (Fig. 4h). V1 cortical responses were again able to follow a repetition rate of up to  
233 13 Hz (Fig. 4i) even if peak amplitude decreased slightly for increasing stimulation  
234 frequencies.

235 We then investigated the spatial distribution of US-evoked neural activity. The peak  
236 depolarization of each channel was measured and linearly interpolated to build pseudocolor  
237 activation maps (Fig. 4j). The size of the US-responding cortical area was dependent on the  
238 US pressure (Fig. 4j-k), and ranged from  $0.58 \pm 0.17 \text{ mm}^2$  ( $n=6$  rats) to  $1.41 \pm 0.23 \text{ mm}^2$  ( $n=5$



239 rats) for US pressures of 0.26 and 1.27 MPa, respectively (Fig. 4l). We investigated the  
240 possibility of achieving patterned US stimulations, by moving the US transducer in 0.4 mm  
241 steps over the recorded area. When the ultrasound probe was moved laterally, the source of  
242 the generated neuronal activity moved in a similar direction (Fig. 4k). The spatial location of  
243 the evoked potentials moved, on average, by  $0.29 \pm 0.09$  mm ( $n=6$  rats) from the previous  
244 location (Fig. 4m), even though we moved the US transducer in 0.4 mm steps. These  
245 measurements were probably conditioned by the 300  $\mu$ m discrete spatial pitch distribution  
246 of the electrodes and the lateral spread of activity in the circuit. These results suggest that  
247 our approach to sonogenetic therapy could yield a spatial resolution of within 400  $\mu$ m for  
248 stimulations at 15 MHz, the focal spot of our 15 MHz transducer being 276  $\mu$ m wide (Fig. 1d).  
249 This opens up the possibility of targeting small areas (down to 0.58 mm<sup>2</sup> for 0.26 MPa),  
250 depending on the pressure level. These very localized US-evoked responses and their  
251 dependence on the position of the US probe confirmed that they were due to the activation  
252 of MscL-G22S-expressing neurons and not to an indirect response related to auditory  
253 activation, as previously suggested by others<sup>35,42</sup>.

254  
255 The possibility of using US stimulation to activate neurons at different depths was then  
256 explored. V1 neurons were recorded with a 16-site penetrating multi-electrode array (Fig.  
257 4d). In V1 neurons expressing MscL-G22S, US stimulation at 15 MHz generated sustained  
258 responses even to 10 ms-long US stimuli (Fig. 4n). The latency of these responses was short  
259 ( $5.10 \pm 0.62$  ms  $n=27$  cells and  $7.51 \pm 1.00$  ms  $n=58$  cells, for 10 ms and 50 ms stimuli  
260 respectively, Fig. 4o), consistent with direct US activation of the recorded cortical neurons.  
261 Responding neurons were recorded at various cortical depths, ranging from 100  $\mu$ m to 1 mm  
262 (Fig. 4p), the focal spot diameter of the US probe being 3.75 mm in the xz plane. Deep  
263 neurons responded reliably to stimuli of decreasing duration, from 50 ms to 10 ms, with  
264 similar firing rates to stimuli of different durations, whereas longer stimuli induced  
265 responses in a broader population of neurons (Fig. 4q-r). By increasing stimulus frequencies  
266 to up to 13 Hz, we were able to evoke responses in cortical neurons (Fig. 4s) with equivalent  
267 firing rates, but the number of responding cells decreased with increasing stimulus  
268 frequency (Fig. 4t).

269 We investigated whether sonogenetic stimulation could also induce light perception,  
270 by assessing mouse behavior following 15 MHz US stimulation of V1 in MscL G22S-

271 transfected ( $n=9$ ) (Fig. E5a) and non-transfected ( $n=7$ ) animals. Mice subjected to water  
272 deprivation were trained to associate the visible-light stimulation of one eye with a water  
273 reward, as previously described<sup>43</sup> (Fig. 5a). This task was learned within four days, as  
274 indicated by the increasing success rate during this period, from 23.57% to 76.09% (Fig. 5b).  
275 The success rate was determined by assessing the occurrence of an anticipatory lick  
276 between the light being switched on and the release of the water reward 500 ms later (Fig.  
277 5a). Following this associative learning phase, the mice were subjected to US stimulation of  
278 V1 on day 5 (Fig. b). Following US stimulation at the highest pressure, MscL-G22S-  
279 transfected mice achieved a success rate (66.98%) similar to that following light stimulation  
280 on day 4 (76.10%) (Fig. 5b). After a pause during the weekend (day 6-7), the animals had  
281 partially forgotten the task associating sonogenetic stimulation with a water reward (Fig.  
282 5b). However, they rapidly recovered an efficient association on day 10 (Fig. 5b). We found  
283 that the latency of the first anticipatory lick was shorter for sonogenetic stimulation ( $193.2 \pm$   
284  $12.8$  ms;  $n=9$ ) than for stimulation with a light flash ( $285.3 \pm 12.4$  ms;  $n=15$ ) (Fig. 5c). This  
285 shorter latency for the US response is consistent with the faster activation of cortical  
286 neurons for sonogenetic stimulation than for light stimulation of the eye (Fig. 4e), suggesting  
287 a shorter delay in the transfer of visual information from the eye to V1. Non-transfected  
288 animals were unable to associate the US-stimulation of their cortex with the water reward  
289 (Fig. 5d), demonstrating that the sonogenetic activation of cortical neurons was truly the  
290 triggering factor, as opposed to the auditory perception of US, as previously reported for  
291 low-frequency US stimulation<sup>35,42</sup>. We applied different US pressures to the visual cortex in  
292 transfected mice and found that success rate increased with pressure (Fig. 5d). Interestingly,  
293 the licking frequency during the 500 ms before delivery of the water reward also increased  
294 with US pressure (Fig. 5e). These results indicate that the sonogenetic stimulation of the  
295 visual cortex generates light perception in mice.

296

297 The development of remotely controlled cortical and subcortical deep neuronal  
298 stimulation techniques is of considerable interest for the treatment of diverse neurological  
299 diseases and sensory handicaps. Optogenetics has been developed for this purpose in non-  
300 human primates, but its potential for transfer into clinical practice is limited by the low level  
301 of light penetration into the brain tissue<sup>23,24</sup>. US stimulation can overcome this limitation<sup>2,44-</sup>  
302 <sup>46</sup>, but the optimal conditions for sonogenetic approaches, in terms of both genetic

303 constructions and acoustic parameters, are far from clear. Most previous sonogenetic  
304 studies focused on the use of low-frequency US<sup>8-10</sup> as, in particular, in the recent  
305 demonstration of MscL-based sonogenetic activation in mice brain with long bursts of low-  
306 frequency US<sup>10</sup>. However, such low-frequency US waves lead to limited centimetric spatial  
307 resolutions (typically around 5x5x45 mm<sup>3</sup>) and an uncontrolled spatial beam distribution,  
308 due to the formation of standing waves<sup>47</sup>. In the rodent brain, this phenomenon generates  
309 reverberations throughout the entire braincase<sup>48</sup>, with the probable activation of non-target  
310 structures, such as the auditory pathway<sup>35,42</sup>. An alternative approach to spatially containing  
311 the US stimulation involves the use of higher US frequencies, but this was thought to  
312 demand higher energy levels, exceeding safety limits and favoring tissue damage<sup>26</sup>. The  
313 bacterial MscL channel has been reported to sensitize neurons to US<sup>10,38</sup> and to lower the  
314 pressure for neuronal activation, but its use for high-spatiotemporal resolution sonogenetic  
315 stimulation has yet to be shown to be effective *in vivo*. We first demonstrated the  
316 expression of MscL *in vivo* in the neurons of the retina. We then determined the most  
317 appropriate conditions for activating the MscL-transfected retinal neurons with high-  
318 frequency US with an appropriate temporal and spatial precision. In the absence of MscL  
319 expression, the retina can respond to US, but with different temporal characteristics, due to  
320 the intrinsic mechanosensitivity of photoreceptors<sup>41</sup>. This attribution of the natural US  
321 response to photoreceptors was supported by its absence in the retinas of P23H rats  
322 presenting severe photoreceptor degeneration or following synaptic blockade in non-  
323 transfected retina (Fig. 2I). Due to the reported rewiring in the P23H retina, we cannot  
324 totally exclude another origin for the natural response to US. However, previous studies  
325 showing electrical activation of the P23H rat retina via the retinal network are not consistent  
326 with this possibility<sup>49-51</sup>. Working towards our goal of cortical visual restoration, we then  
327 showed that MscL-G22S was effectively expressed in cortical neurons. The activation of  
328 these MscL-expressing neurons resulted in responses with millisecond latencies and a spatial  
329 resolution of at least 400  $\mu$ m in the *xy* plane and 3.75 mm on the *z* axis, consistent with  
330 neuronal responses throughout the depth of the cortex (Fig. 4m-p). Moreover, MscL G22s  
331 expression in the visual cortex led to a behavioral response upon US stimulation, confirming  
332 light perception following sonogenetic activation of the visual cortex. These sonogenetic  
333 responses were genuinely related to MscL expression, as they were not observed in non-  
334 transfected animals. The sonogenetic approach presented here greatly decreased the US

335 pressure required for the activation of RGCs and V1 cortical neurons by high-frequency US  
336 with stimulation sequences remaining below FDA safety limits (510k, Track 3) for US imaging  
337 (e.g. for a 10 ms US stimulus of 0.6 MPa, the  $I_{spt}$  is  $12 \text{ W/cm}^2$  and the  $I_{spta}$  value is  $0.12$   
338  $\text{W/cm}^2$ ). These very low acoustic pressures and acoustic intensities prevent tissue damage,  
339 as they are similar to those that have been widely used in clinical diagnostic imaging for  
340 decades<sup>52,53</sup> Moreover, simulations of US-induced heating in brain tissue revealed that  
341 typical US parameters (i.e. 20 ms, 1.27 MPa) (Fig. 4e-h) increased the local temperature by  
342 an estimated  $0.12 \text{ }^\circ\text{C}$  (see methods), with even high repetition rates (up to 13 Hz) leading to  
343 a moderate temperature increase ( $<0.3 \text{ }^\circ\text{C}$ ) (Fig. E4c-f). These low-temperature fluctuations  
344 and stimulation sequences compliant with FDA limits suggest that our approach had no toxic  
345 side effects and that US-elicited responses were not temperature-driven and were therefore  
346 probably mediated by mechanical activation of the MscL channel by US. Following on from  
347 previous demonstrations that the MscL channel is a suitable sonogenetic actuator<sup>10,34,38</sup>, we  
348 provide *in vivo* evidence that the MscL channel has appropriate kinetics for the activation of  
349 neurons at a precise spatiotemporal resolution *in situ* and *in vivo*. Previous *in vivo* studies  
350 reported the restoration of form vision at cortical level with 0.5 to 1 mm surface electrodes  
351 spaced more than 1 mm apart<sup>13-15</sup>. The resolution of the proposed sonogenetic therapy  
352 therefore appears to be compatible with the restoration of form vision. Moreover, the  
353 resolution of the approach could be increased by using gene therapy to drive expression in  
354 specific cell populations and cell compartments<sup>54</sup>. Further studies are required to generate  
355 an interface for coding visual information into US patterns transmitted by an ultrasonic  
356 matrix array onto the visual cortex at a video rate. Computer algorithms will probably be  
357 required to model complex visual features, such as flicker fusion, in the US encoder.  
358 However, our approach provides great hope for the development of high-resolution visual  
359 restoration at the cortical level, through its unique combination of a rapid response, high  
360 spatial resolution, and some cell selectivity with promoters, all features essential for video-  
361 rate brain-wide pattern stimulation. Even if this approach requires craniotomy, as for other  
362 existing visual prostheses, it provides a less invasive approach based on deep and distant  
363 cortical activation from above the dura mater following AAV cortical injections. The reported  
364 long-term expression of genes following AAV gene therapy<sup>55</sup> suggests that this strategy  
365 could provide stable sight restoration. More generally, it paves the way for a new type of

366 brain-machine interface capable of compensating for disabilities and suitable for use in the  
367 treatment of neurological disorders.  
368

## 369 **Methods**

### 370 **Animals**

371 All experiments were conducted in accordance with the National Institutes of Health Guide  
372 for the Care and Use of Laboratory Animals. The experimental protocols were approved by  
373 the Local Animal Ethics Committee (Committee Charles Darwin no. 5, registration number  
374 9529 and 26889) and conducted in agreement with Directive 2010/63/EU of the European  
375 Parliament. All rats included in this study were Long Evans rats from Janvier Laboratories or  
376 P23H (line 1) transgenic rats. Wild-type mice (C57BL/6J) were obtained from Janvier  
377 Laboratories. Before being included in experimental procedures, at least 5 days of  
378 adaptation to the local animal facility were allowed to animals in which they were enclosed  
379 in a controlled environment with a half-day dark/light cycle with nutrition *ad libitum* with  
380 enrichment.

381

### 382 **Plasmid cloning & AAV production**

383 Plasmids containing the *Escherichia coli* *MscL* sequence in the WT form and with the G22S  
384 mutation were obtained from Francesco Difato (Addgene plasmids #107454 and #107455)<sup>56</sup>.  
385 For the targeting of retinal ganglion cells, the SNCG promoter<sup>40</sup> was inserted into an AAV  
386 backbone plasmid containing the *MscL* sequence fused to the tdTomato gene and the Kir2.1  
387 ER export signal, to drive expression at the plasma membrane. An AAV2.7m8 vector was  
388 used for intra-vitreous delivery. For the targeting of neurons in the cortical layers of V1, the  
389 SNCG promoter was replaced by the CamKII promoter and an AAV9.7m8 vector was chosen.  
390 All the recombinant AAVs used in this study were produced by the plasmid cotransfection  
391 method, and the resulting lysates were purified by iodixanol purification as previously  
392 described, to yield high titer recombinant AAV virus<sup>57</sup>.

393

### 394 **US stimulus**

395 Three focused ultrasound transducers with different central frequencies were used, to  
396 obtain focal spots of different sizes: a low-frequency transducer at 0.5 MHz (diameter  $\varnothing$  = 1  
397 inch = 25.4mm, focal distance  $f$  = 1.25 inch = 31.7 mm) (V301-SU, Olympus), a transducer at  
398 an intermediate frequency of 2.25 MHz ( $\varnothing$  = 0.5 inch = 12.7 mm,  $f$  = 1 inch = 25.4 mm)  
399 (V306-SU, Olympus) and a high-frequency transducer at 15 MHz ( $\varnothing$  = 0.5 inch = 12.7 mm,  $f$  =

400 1 inch = 25.4 mm) (V319-SU, Olympus). Acoustic fields radiated by those three focused  
401 transducers are presented in Figure 1 (simulations) and extended figure E3 (experimental  
402 measurements). A TiePie Handyscope (HS3, TiePie Engineering) was used to produce the  
403 stimulus waveform, which was then passed through an 80 dB RF power amplifier (VBA 230-  
404 80, Vectawave) connected to the transducer. Transducer pressure outputs (pressure at  
405 focus, 3D pressure maps) were measured in a degassed water tank with a Royer-Dieulesaint  
406 heterodyne interferometer<sup>58</sup>. The US stimuli used for *ex vivo* and *in vivo* stimulation had the  
407 following characteristics: 1 kHz pulse repetition frequency with a 50% duty cycle, sonication  
408 duration between 10 and 200 ms and inter-stimulus interval between 0.01 and 2 s. Peak  
409 acoustic pressures were ranging from 0.11-0.88 MPa, 0.3-1.6 MPa, 0.2-1.27 MPa, for the 0.5,  
410 2.25 and 15 MHz transducers, respectively. The corresponding estimated Isppa values were  
411 0.39-25.14 W/cm<sup>2</sup>, 2.92-83.12 W/cm<sup>2</sup> and 1.30-52.37 W/cm<sup>2</sup>.

412

### 413 ***Ex vivo***

#### 414 **Intra-vitreous gene delivery and retinal imaging**

415 Rats were anesthetized with isoflurane (5% for induction, 3% for maintenance) and 2 µl of  
416 AAV suspension, containing between 8 and 14 x 10<sup>10</sup> viral particles, was injected into the  
417 center of the vitreous cavity with direct observation of the tip of the needle. One month  
418 after injection, fluorescence imaging was performed on the injected eyes, with a Micron IV  
419 retinal imaging microscope (Phoenix Research Laboratories) used to observe MscL  
420 expression via the fluorescent tdTomato tag. Electrophysiological recordings were  
421 performed at least one month after injection.

422

#### 423 **MEA recordings**

424 Retinas were isolated under dim red light, in Ames' medium (A1420, Sigma-Aldrich) bubbled  
425 with 95% O<sub>2</sub> and 5% CO<sub>2</sub> at room temperature. Pieces of the retina were flattened on a filter  
426 membrane (Whatman, GE Healthcare Life Sciences) and placed on a poly-L-lysine (0.1%,  
427 Sigma) coated multi-electrode array (electrode diameter 30 µm, spacing 200 µm, MEA256  
428 200/30 iR-ITO, MultiChannel Systems) with retinal ganglion cells facing the electrodes. The  
429 retina was continuously perfused with bubbled Ames medium at 34 °C, at a rate of 2 ml/min,  
430 during experiments.

431 TdTomato fluorescence was checked before recordings, by using a stereo microscope  
432 (SMZ25, Nikon) to observe transgene expression in the recorded area. For some experiments  
433 the AMPA/kainate glutamate receptor antagonist 6-cyano-7-nitroquinoxaline-2,3-dione  
434 (CNQX, 25  $\mu$ M, Sigma-Aldrich), the NMDA glutamate receptor antagonist [3H]3-(2-  
435 carboxypiperazin-4-yl) propyl-1-phosphonic acid (CPP, 10  $\mu$ M, Sigma- Aldrich) and a selective  
436 group III metabotropic glutamate receptor agonist, L-(+)-2-amino-4-phosphonobutyric acid  
437 (L-AP4, 50  $\mu$ M, Tocris Bioscience), were freshly diluted and bath-applied through the  
438 perfusion line 10 minutes before recording. Full-field light stimuli were delivered with a  
439 digital micro-mirror display (DMD, Vialux, resolution 1024x768) coupled to a white light LED  
440 light source (MNWHL4, Thorlabs) focused on the photoreceptor plane. An irradiance of 1  
441  $\mu$ W/cm<sup>2</sup> was used. The US transducers were coupled with a custom-made coupling cone  
442 filled with degassed water, mounted on a motorized stage (PT3/M-Z8, Thorlabs) and placed  
443 orthogonally in the recording chamber above the retina. For positioning of the US transducer  
444 over the retina, the reflected signal of the MEA chip and the retina was detected with an US-  
445 key device (Lecoeur Electronique). The distance between the retina and the transducer was  
446 equal to the focal length of the transducer; this was verified with the flight time of the  
447 reflected signal. RGC recordings were digitized with a 252-channel preamplifier  
448 (MultiChannel Systems). Spikes from individual neurons were sorted with SpykingCircus  
449 software<sup>59</sup>. RGC responses were then analyzed with custom scripts written in Matlab  
450 (MathWorks). They were classified as ON, ON-OFF or OFF, with the response dominance  
451 index<sup>60</sup>. The latency of each cell relative to the start or end of the stimulus was calculated as  
452 the time between the start of the stimulus and the maximum of the derivative of spike  
453 density function. For cells responding to US stimulation, two classes were identified on the  
454 basis of latency — short and long latency — by fixing a threshold equal to the minimum of  
455 the latency distribution of the responses of non-transfected cells to US (45 ms). We  
456 determined the peak value A of spike density function for the calculation of response  
457 duration, which was defined as the time interval between the two time points for which the  
458 SDF was equal to  $A/e$  ( $e$ : Euler's number). The percentage of cells responding to US  
459 stimulation of increasing US pressure was calculated as the ratio of the number of activated  
460 cells to the maximum number of responding cells for all the US pressures considered. The  
461 Fano factor, quantifying spike-count variability, was calculated as the ratio of the variance of  
462 the spike-count to the mean. Values close to 1 indicate that information can be transmitted.



463 The Euclidean distance between two activated cells was weighted according to the  
464 maximum firing rate of the cells. The ratio of the number of activated cells to the size of the  
465 area stimulated on the MEA chip was calculated considering the size of the US focal spot for  
466 2.25 and 15 MHz and the size of the MEA for 0.5 MHz, because the focal spot was larger  
467 than the MEA for this frequency. The center of the response was estimated by weighting the  
468 maximum firing rate of each cell by its distance from other responding cells, and the  
469 displacement of the response was calculated as the Euclidean distance between two center-  
470 of-response positions.

471

## 472 ***In vivo***

### 473 **Intracranial injections**

474 Rats or mice were anesthetized with a ketamine/medetomidine mixture (40 mg/kg / 0.14  
475 mg/kg) or ketamine/xylazine (80 mg/kg / 8 mg/kg) respectively, and injected subcutaneously  
476 with Buprenorphine (0.05 mg/kg - Buprecare, Axience) before surgery. The surgical site was  
477 shaved, cleaned with antiseptic solution and a midline incision was made to expose the skull  
478 bone after local injection of Lidocaïne (4 mg/kg) (Laocaïne, Centravet). During all procedure,  
479 body temperature was maintained at 37°C by a thermostatically regulated heating pad, and  
480 eyes were covered with black tissue. The animal was placed in a stereotactic frame and holes  
481 were drilled at the injection sites. AAV suspensions were injected into the right hemisphere  
482 at two different locations in rats(2.6 mm ML, 6.8 mm AP and 3.1 mm ML, 7.2 mm AP from  
483 bregma) or at one location in mice (2.5 mm ML, 3.5 mm AP from bregma). In rats, for each  
484 injection site, 200 nl of viral vector (containing  $0.2-8 \times 10^{15}$  viral particles) was injected at  
485 three different depths (1100, 1350 and 1500  $\mu\text{m}$  DV) with a micro-syringe pump controller  
486 (Micro4 ,World Precision Instruments) operating at a rate of 50 nl/min and a 10  $\mu\text{l}$  Hamilton  
487 syringe. In mice, 1  $\mu\text{l}$  of viral vector (containing  $0.2-8 \times 10^{15}$  viral particles) was injected at -  
488 400  $\mu\text{m}$  DV at a rate of 100 nL/min. At the end of surgery, animals were awakened with  
489 subcutaneous injection of Atipamazole (0.9 mg/kg) (Antidorm, Axience)

490 All animals were injected subcutaneously with Buprenorphine (0.05 mg/kg) one day after  
491 the intracranial injections (Buprecare, Axience). Electrophysiological recordings or  
492 craniotomy surgery for behavioral training in mice were performed at least one month after  
493 injections.

494

## 495 ***In vivo* extracellular recordings**

496 Rats were anesthetized with a mixture of ketamine and medetomidine (40 mg/kg / 0.14  
497 mg/kg). Pupils were dilated with tropicamide (Mydriaticum, Dispersa). A small craniotomy  
498 (5x5 mm square) was drilled above V1 in the right hemisphere. Before recording, tdTomato  
499 fluorescence was checked with a Micron IV retinal imaging microscope (Phoenix Research  
500 Laboratories). A 32-site  $\mu$ Ecog electrode array (30  $\mu$ m electrode diameter, 300  $\mu$ m electrode  
501 spacing, FlexMEA36, MultiChannel Systems) was positioned over the transfected brain  
502 region for rats expressing MscL G22S or in a similar zone for control rats. After  $\mu$ Ecog  
503 recordings, multi-electrode (MEA) recordings were performed with a 16-site silicon  
504 microprobe (electrode diameter 30  $\mu$ m, spacing 50  $\mu$ m, A1x16-5mm-50-703, NeuroNexus  
505 Technologies). The MEA probe was advanced 1100  $\mu$ m into the cortex with a three-axis  
506 micromanipulator (Sutter Instruments, Novato, CA). The US transducer was coupled to the  
507 brain with a custom-made coupling cone filled with degassed water and US gel, and was  
508 positioned over the region of interest with a motorized stage. The probe and the US  
509 transducer were perpendicular for  $\mu$ Ecog recordings and tilted at 45° for intracortical  
510 recording. The distance between the target in the cortex and the transducer was equal to  
511 the focal length of the transducer, as defined by custom-made US transducer coupling  
512 cones. Visual stimuli were generated by a white light-collimated LED (MNWHL4, Thorlabs)  
513 placed 15 cm away from the eye. Light irradiance at the level of the cornea was 4.5 mW/cm<sup>2</sup>.  
514 The  $\mu$ Ecog and extracellular signals were digitized with a 32-channel amplifier and a 16-  
515 channel amplifier, respectively (model ME32/16-FAI- $\mu$ PA, MultiChannel Systems).  $\mu$ Ecog  
516 recordings were further analyzed with custom-developed Matlab scripts. MEA recordings  
517 were further analyzed with SpykingCircus software, and single-cell events were analyzed  
518 with custom-developed Matlab scripts. For  $\mu$ Ecog recordings, response duration was  
519 calculated as the interval between the two time points at which the cortical evoked potential  
520 was equal to  $A/e$  (where  $A$  is peak depolarization and  $e$  is Euler's number). The peak  
521 depolarization of each channel was linearly interpolated to build pseudocolor activation  
522 maps. The activated area was defined as the area of the pseudocolor activation map over  
523 which peak depolarization exceeded the background noise level calculated as 2 times the  
524 standard deviation of the signal. The center of the response was estimated by weighting the  
525 peak depolarization of each electrode by its distance from other electrodes. For intracortical

526 recordings, cell latency was estimated as the time between the stimulus onset and the  
527 maximum of the derivative of spike density function.

528

### 529 **Surgery for *in vivo* behavioral testing**

530 Before surgery, mice were injected subcutaneously with Buprenorphine (0,05 mg/kg mouse)  
531 (Buprécare, Axience), and Dexamethasone (0,7 mg/kg) (Dexazone, Virbac). Animals were  
532 anesthetized with Isoflurane (5% induction, 2% maintenance, in air/oxygen mixture) and the  
533 head was shaved and cleaned with antiseptic solution. Next, animals were head-fixed on a  
534 stereotactic frame with an Isoflurane delivering system, eye ointment was applied and a  
535 black tissue was placed over the eyes. During all procedures when mice were under  
536 anesthesia, body temperature was maintained at 37°C by a thermostatically regulated  
537 heating pad. After a local injection of Lidocaïne (4 mg/kg) (Laocaïne, Centravet), an incision  
538 of the skin was made. Two screws were fixed in the skull, after a small craniotomy  
539 (approximately 5 mm x 5 mm) was drilled above V1 in the right hemisphere (0.5 mm steel  
540 drill) and cortex buffer was applied. The cortex was covered with a TPX plastic sheet (125  
541 µm thick) and sealed with dental acrylic cement (Tetric Evoflow). For behavioral  
542 experiments, a metallic headbar (Phenosys) for head fixation was then glued to the skull on  
543 the left hemisphere with dental cement (FUJUCEM II). At the end of the surgery, animals  
544 were placed in a recovery chamber, with subcutaneous injection of physiological serum and  
545 ointment on the eyes (Ophtalon, Centravet). Buprenorphine was injected during post-  
546 surgery monitoring. Behavioral training in mice was performed at least 10 days after the  
547 surgical procedure.

548

### 549 **Mouse behavioral tests**

550 C57BL6J mice were placed on a water restriction schedule, in which they received ~ 0.5-1 mL  
551 of water per day until they reached approximately 80-85% of their weight with water  
552 supplied *ad libitum*. Mice were progressively habituated to drinking from a syringe, and head  
553 fixation and enclosure in a cylindrical body tube for the first five days. They were then  
554 trained to respond to a light stimulus by performing a voluntary detection task: licking a  
555 waterspout (blunt 18G needle, approximately 5 mm from mouth) in response to white light  
556 full-field stimulation (200 and 50 ms long) of the left eye (dilated with tropicamide,  
557 Mydriaticum Dispersa). Water (~4

558  $\mu$ L) was automatically dispensed 500 ms after the light was switched on, through a  
559 calibrated water system. The behavioral protocol and lick detection were controlled by a  
560 custom-made system, as previously described<sup>43</sup>. Visible light training lasted four days, with a  
561 typical training session lasting approximately 30 minutes and including 75-100 trials. After  
562 light stimulation training, four days (the first and second days were separated by a two-day  
563 break during the weekend) of US stimulation of the right hemisphere V1 were performed.  
564 During these four days, US stimulation was delivered for 50 ms at three different pressure  
565 values (0.2, 0.7 and 1.2 MPa). These pressure values were delivered each day but in a  
566 different order. Inter-trial intervals for light and US stimulation varied randomly and ranged  
567 between 10 and 30 s. The 15 MHz US transducer was coupled to the brain with a custom-  
568 made coupling cone filled with water and US gel, positioned over the region of interest with  
569 a motorized stage. We investigated the impact of light and US stimulation on mouse  
570 behavior, by assessing the success rate by counting the number of trials in which mice  
571 performed anticipatory licks (between the start of the stimulus and the opening of the water  
572 valve). The anticipatory lick rate was calculated by subtraction from the spontaneous lick  
573 rate (calculated in a 1 s time window before stimulus onset) and multiplication by the  
574 success rate. Lick latency was calculated by determining the time to the first anticipatory lick  
575 after stimulus onset.

576

### 577 **Immunohistochemistry and confocal imaging**

578 Transduced retinas and brains were fixed by incubation in 4% paraformaldehyde (100496,  
579 Sigma-Aldrich) for 30 minutes for retinas, and overnight for brains. Brains were  
580 cryoprotected in 30% sucrose (84097, Sigma-Aldrich), and 50  $\mu$ m thick sagittal slices were  
581 cut with a microtome (HM450, Microm). The slices displaying the highest levels of tdTomato  
582 fluorescence from each brain were selected for further immunohistochemistry and imaging.  
583 Retinas and sagittal brain cryosections were permeabilized by incubation in 0.5% Triton X-  
584 100 in PBS for 1 h at room temperature and then incubated in blocking buffer (PBS + 1% BSA  
585 + 0.1% Tween 20) for 1 h at room temperature. Samples were incubated overnight at 4 °C  
586 with a monoclonal anti-RBPMS antibody (1:500, Rabbit, ABN1362, Merck Millipore) for the  
587 retina, with a monoclonal anti-NeuN antibody (1:500; Mouse, MAB377, Merck Millipore) for  
588 brain sections in 0.5x blocking buffer supplemented with 0.5% Triton X-100. The sections  
589 were then incubated with secondary antibodies conjugated with Alexa Fluor (1:500;

590 Molecular Probes) and DAPI (1:1000, D9542, Merck Millipore) for 1 h at room temperature.  
591 An Olympus FV1000 laser scanning confocal microscope with 20x objective (UPLSAPO 20XO,  
592 NA: 0.85) was used to acquire images of flat-mounted retinas and brain sections.  
593 For the assessment of transduction efficiency, confocal images were processed with FIJI  
594 (ImageJ). RBPMS- and NeuN-positive cells were counted automatically with the *Analyze*  
595 *particles* FIJI plugin. MscL-tdTomato- and MscL-tdTomato-RBPMS/NeuN-positive cells were  
596 counted manually by two different users, with the CellCounter FIJI plugin. For the retina,  
597 quantification was performed by identifying the transfected area in each retina and  
598 acquiring confocal stacks in at least four randomly chosen regions of 0.4 mm<sup>2</sup> per retina (Fig.  
599 E1). For V1 neurons, the sagittal brain slice with the largest *MscL*-expressing zone was  
600 selected for each animal. In some slices, tdTomato also diffused outside V1. A ROI in V1 was,  
601 therefore, manually defined and quantifications were performed in at least six randomly  
602 chosen regions of 0.4 mm<sup>2</sup>.

603

604

#### 605 **US-induced tissue-heating simulations**

606 When considering cell stimulation at higher US frequencies (15 MHz) than usually described  
607 in the US neuromodulation literature, it is essential to estimate thermal effects as they can  
608 become important. A three-fold process was used for this estimation: 1) simulation of the  
609 acoustic fields generated by the three transducers used, with realistic acoustic parameters,  
610 2) verification that non-linear acoustics did not play an important role in heat transfer and 3)  
611 realistic simulations of the heat transfer and temperature rise induced at the focus by US in a  
612 linear regime for the parameters used in this study.

613

614 For non-linear simulations we used Matlab's toolbox *kWave*, by defining the geometry of the  
615 transducer in 3D, and using the following parameters for the propagation medium (water):  
616 sound speed  $c = 1500 \text{ m s}^{-1}$ , volumetric mass  $\rho = 1000 \text{ kg m}^{-3}$ , non-linearity coefficient  $B/A$   
617  $= 5$ , attenuation coefficient  $\alpha = 2.2 \cdot 10^{-3} \text{ dB cm}^{-1} \text{ MHz}^{-y}$ , and frequency power law of the  
618 attenuation coefficient  $y = 2$ <sup>61</sup>. We simulated quasi-monochromatic 3D wave-fields using  
619 long bursts of 50 cycles; this gave us both the maximum pressure field in 3D and the  
620 waveform at the focus. Simulations were calibrated by adjusting the input pressure  
621 (excitation of the simulated transducer) to reach the pressure at the focus measured in the

622 water tank with the real transducers. The FWHM focal spot diameter in the xy plane was  
623 4.36, 1.61 and 0.276 mm, and the major axis in the xz plane was 32.3, 20.6 and 3.75 mm long  
624 for the 0.5, 2.25 and 15 MHz transducers, respectively (Fig. 1b-d). Non-linear effects were  
625 evaluated by estimating the relative harmonic content of the waveform at the focus. In the  
626 15 MHz focus transducer example in figure 1d, the experimental and simulated signals at the  
627 focal spot were compared and found to be highly concordant (Fig. E4a). Furthermore, the  
628 amplitude of the second harmonic is 19.8 dB below the fundamental (20.9 dB in the  
629 simulated case), meaning that if the fundamental energy is E, the second harmonic has  
630 energy E/95 (Fig. E4b). Therefore, we can reasonably neglect the non-linear effects in the  
631 calculations of the thermal effects, as they account for ~1% of the energy involved. The same  
632 conclusions were drawn at 0.5 MHz and 15 MHz. The use of linear wave propagation  
633 approximations considerably decreased the computing cost of the simulations. Linear  
634 propagation simulations were conducted with the *Field II* toolbox in Matlab<sup>62,63</sup>, in  
635 monochromatic mode, with the same medium properties as *kWave* (water), to obtain the 3D  
636 maximum pressure fields. These maximum pressure fields were used to build a heating  
637 source term  $Q_{US} = \frac{\alpha_{np} p_{max}^2}{\rho_b c_b}$ , where  $\alpha_{np}$  is the absorption coefficient of the brain at the  
638 considered frequency (59.04 Np m<sup>-1</sup> at 15 MHz, calculated from  $\alpha_{brain} = 0.21$  dB cm<sup>-1</sup> MHz<sup>-y</sup>  
639 and  $y = 1.18$ ), the brain volumetric mass  $\rho_{brain} = 1046$  kg m<sup>-3</sup>, the brain sound speed  
640  $c_{brain} = 1546$  m s<sup>-1</sup><sup>61,64</sup>, and  $p_{max}$  is the 3D maximum pressure field. This source term was  
641 then used in the resolution of a Penne's bioheat equation  $\rho_{brain} C_{brain} \cdot \frac{\partial T}{\partial t} = \text{div}(K_t \cdot \nabla T) -$   
642  $\rho_{blood} C_{blood} P_{blood} (T - T_a) + Q$  in *kWave*, where  $C_{brain}$  is the blood specific heat capacity  
643 (3630 J.kg<sup>-1</sup> °C<sup>-1</sup>),  $K_t$  the brain thermal conductivity (0.51 W.m<sup>-1</sup> °C<sup>-1</sup>),  $\rho_{blood}$  the blood  
644 density 1050 kg m<sup>-3</sup>,  $C_{blood}$  the blood specific heat capacity (3617 J.kg<sup>-1</sup> °C<sup>-1</sup>),  $P_{blood}$  the  
645 blood perfusion coefficient (9.7 10<sup>-3</sup> s<sup>-1</sup>),  $T_a$  the arterial temperature (37°C), and  $Q = Q_{US} +$   
646  $\rho_{brain} \cdot \gamma_{brain}$  with  $\gamma_{brain}$  the heat generation of the brain tissue (11.37 W kg<sup>-1</sup>)<sup>64,65</sup>. The  
647 initial condition for brain temperature was set to  $T_0 = 37$  °C.

648

649 This simulation corresponds to the worst case scenario regarding the temperature rise given:  
650 1) that the acoustic propagation is simulated in water only, with a lower attenuation  
651 coefficient (2.2 10<sup>-3</sup> dB cm MHz<sup>-2</sup>) than the brain (0.59 dB cm MHz<sup>-1.27</sup>), even if a part of the  
652 propagation occurs within the brain.  $p_{max}$  maps are, therefore, overestimated. 2) thermal

653 absorption is simulated in brain tissue only, with a higher absorption coefficient (0.21 dB cm  
654 MHz<sup>-1.18</sup>) than water, even if a part of the maximum pressure field is actually located within  
655 the water of the acoustic coupling cone.  $Q_{US}$  is, therefore, slightly overestimated. We  
656 mapped the temperature in three spatial dimensions and time, and looked for the point of  
657 maximal temperature rise (Fig. E4 c-f).

658

#### 659 **Statistical analysis**

660 Statistical analysis was carried out with Prism software (Prism 7, GraphPad). All values are  
661 expressed and represented as means  $\pm$  the standard error of the mean (SEM). The statistical  
662 tests performed are detailed in the figure legends. Data were analyzed in unpaired Welch's  
663  $t$ -tests (two-tailed).

664

#### 665 **Data availability**

666 The data supporting the findings of this study are available from the corresponding author  
667 upon reasonable request.

668

#### 669 **Code availability**

670 The custom Matlab codes are available from the corresponding author upon reasonable  
671 request.

672

673

## 674 **Acknowledgements**

675 The authors would like to thank C. Joffrois, M. Valet, Q. Cesar, M. Desrosiers, S. Fouquet, P.  
676 Annic, M. Celik, Z. Raics for technical help and scientific advice. This work was supported by  
677 the European Research Council (ERC) Synergy Grant Scheme (holistic evaluation of light and  
678 multiwave applications to high-resolution imaging in ophthalmic translational research  
679 revisiting the Helmholtzian synergies, ERC Grant Agreement #610110), by the European  
680 Union's Horizon 2020 research and innovation programme under grant agreement No.  
681 785219 (Graphene Flagship Core 2) No. 881603 (Graphene flagship Core3), by the  
682 Foundation Fighting Blindness, *la Fédération des Aveugles de France*, Optic 2000, the city of  
683 Paris, *Région ile de France*, the *Agence Nationale de la Recherche* (ANR BrainOptoSight), and  
684 French state funds managed by the *Agence Nationale de la Recherche* (ANR) within  
685 *Programme Investissements d'Avenir, Laboratoire d'Excellence* (LABEX) LIFESENSES (ANR-10-  
686 LABX-0065) and *Institut Hospitalo-Universitaire FOReSIGHT* (ANR-18-IAHU-0001).

687

## 688 **Author Contributions**

689 S.C, C.D. designed the experiments, S.C.,M.P., G.L.,I.A., J.L, R.G., E.B., J.D. carried out the  
690 experiments and analyzed the data, M.P., D.N., G.G., F.A., O.M., D.D., M.S., B.R. provided  
691 support for experiments, study design and data analysis, S.P., M.T. , J.S. conceived the idea  
692 for this project and supervised the analysis of the data obtained. S.C., S.P., M.T., C.D, wrote  
693 the manuscript. All authors provided critical feedback on the research and the manuscript.

## 694 **Competing interest declaration**

695 The authors have filed for a patent for devices and methods for sonogenetic stimulation.

## 696 **Materials & Correspondence**

697 Correspondence and requests for materials should be addressed to [serge.picaud@inserm.fr](mailto:serge.picaud@inserm.fr).

698

## 699 **References**

- 700 1. Legon, W. *et al.* Transcranial focused ultrasound modulates the activity of primary  
701 somatosensory cortex in humans. *Nat. Neurosci.* **17**, 322–329 (2014).
- 702 2. Tufail, Y., Yoshihiro, A., Pati, S., Li, M. M. & Tyler, W. J. Ultrasonic neuromodulation by



- 703 brain stimulation with transcranial ultrasound. *Nat. Protoc.* **6**, 1453–1470 (2011).
- 704 3. Deffieux, T. *et al.* Low-intensity focused ultrasound modulates monkey visuomotor  
705 behavior. *Curr. Biol.* **23**, 2430–2433 (2013).
- 706 4. Mehić, E. *et al.* Increased anatomical specificity of neuromodulation via modulated  
707 focused ultrasound. *PLoS One* **9**, (2014).
- 708 5. Tufail, Y. *et al.* Transcranial Pulsed Ultrasound Stimulates Intact Brain Circuits. *Neuron*  
709 **66**, 681–694 (2010).
- 710 6. Lee, W. *et al.* Image-Guided Focused Ultrasound-Mediated Regional Brain Stimulation  
711 in Sheep. *Ultrasound Med. Biol.* **42**, 459–470 (2016).
- 712 7. Legon, W., Bansal, P., Tyshynsky, R., Ai, L. & Mueller, J. K. Transcranial focused  
713 ultrasound neuromodulation of the human primary motor cortex. *Sci. Rep.* **8**, 10007  
714 (2018).
- 715 8. Yang, Y. *et al.* Sonogenetics for noninvasive and cellular-level neuromodulation in  
716 rodent brain. *bioRxiv* 2020.01.28.919910 (2020). doi:10.1101/2020.01.28.919910
- 717 9. Huang, Y.-S. *et al.* Sonogenetic Modulation of Cellular Activities Using an Engineered  
718 Auditory-Sensing Protein. (2020). doi:10.1021/acs.nanolett.9b04373
- 719 10. Qiu, Z., Kala, S., Guo, J., Yang, M. & Wang, H. Targeted Neurostimulation in Mouse  
720 Brains with Non-invasive Ultrasound. (2020). doi:10.1016/j.celrep.2020.108033
- 721 11. Hyungmin Kim, Alan Chiu, Stephanie D. Lee, Krisztina Fischer, S.-S. Y. Focused  
722 Ultrasound-mediated Non-invasive Brain Stimulation: Examination of Sonication  
723 Parameters. *Brain Stimul.* **7**, 748–756 (2014).
- 724 12. Obidin, N., Tasnim, F. & Dagdeviren, C. The Future of Neuroimplantable Devices: A  
725 Materials Science and Regulatory Perspective. *Adv. Mater.* **32**, 1901482 (2020).
- 726 13. Brindley, G. S. & Lewin, W. S. The sensations produced by electrical stimulation of the  
727 visual cortex. *J. Physiol.* **196**, 479–493 (1968).
- 728 14. Dobbelle, W. H. Artificial vision for the blind by connecting a television camera to the

- 729 visual cortex. *ASAIO J.* **46**, 3–9 (2000).
- 730 15. Beauchamp, M. S. *et al.* Dynamic Stimulation of Visual Cortex Produces Form Vision in  
731 Sighted and Blind Humans. *Cell* **181**, 774–783.e5 (2020).
- 732 16. Tehovnik, E. J., Slocum, W. M. & Schiller, P. H. Saccadic eye movements evoked by  
733 microstimulation of striate cortex. *Eur. J. Neurosci.* **17**, 870–878 (2003).
- 734 17. Chen, X., Wang, F., Fernandez, E. & Roelfsema, P. R. Shape perception via a high-  
735 channel-count neuroprosthesis in monkey visual cortex. *Science (80-. )*. **370**, 1191–  
736 1196 (2020).
- 737 18. Ferrari, U. *et al.* Towards optogenetic vision restoration with high resolution. *PLOS*  
738 *Comput. Biol.* **16**, e1007857 (2020).
- 739 19. McGregor, J. E. *et al.* Optogenetic restoration of retinal ganglion cell activity in the  
740 living primate. *Nat. Commun.* **11**, 1703 (2020).
- 741 20. Gauvain, G. *et al.* Optogenetic therapy: high spatiotemporal resolution and pattern  
742 discrimination compatible with vision restoration in non-human primates. *Commun.*  
743 *Biol.* **4**, 1–15 (2021).
- 744 21. Sahel, J.-A. *et al.* Partial recovery of visual function in a blind patient after optogenetic  
745 therapy. *Nat. Med.* 2021 277 **27**, 1223–1229 (2021).
- 746 22. Chernov, M. M., Friedman, R. M., Chen, G., Stoner, G. R. & Roe, A. W. Functionally  
747 specific optogenetic modulation in primate visual cortex. *Proc. Natl. Acad. Sci. U. S. A.*  
748 **115**, 10505–10510 (2018).
- 749 23. Ju, N., Jiang, R., Macknik, S. L., Martinez-Conde, S. & Tang, S. Long-term all-optical  
750 interrogation of cortical neurons in awake-behaving nonhuman primates. *PLOS Biol.*  
751 **16**, e2005839 (2018).
- 752 24. Jazayeri, M., Lindbloom-Brown, Z. & Horwitz, G. D. Saccadic eye movements evoked  
753 by optogenetic activation of primate V1. *Nat. Neurosci.* **15**, 1368–1370 (2012).
- 754 25. McAlinden, N. *et al.* Multisite microLED optrode array for neural interfacing.  
755 *Neurophotonics* **6**, 1 (2019).

- 756 26. Ye, P. P., Brown, J. R. & Pauly, K. B. Frequency dependence of ultrasound  
757 neurostimulation in the mouse brain. *Ultrasound Med. Biol.* **42**, 1512–1530 (2016).
- 758 27. Ye, J. *et al.* Ultrasonic Control of Neural Activity through Activation of the  
759 Mechanosensitive Channel MscL. *Nano Lett.* **18**, 4148–4155 (2018).
- 760 28. Ibsen, S., Tong, A., Schutt, C., Esener, S. & Chalasani, S. H. Sonogenetics is a non-  
761 invasive approach to activating neurons in *Caenorhabditis elegans*. *Nat. Commun.* **6**,  
762 8264 (2015).
- 763 29. Ye, P. P., Brown, J. R. & Pauly, K. B. Frequency dependence of ultrasound  
764 neurostimulation in the mouse brain. *Ultrasound Med. Biol.* **42**, 1512–1530 (2016).
- 765 30. Hamill, O. P. & Martinac, B. Molecular basis of mechanotransduction in living cells.  
766 *Physiological Reviews* **81**, 685–740 (2001).
- 767 31. Perozo, E. Gating prokaryotic mechanosensitive channels. *Nature Reviews Molecular*  
768 *Cell Biology* **7**, 109–119 (2006).
- 769 32. Sukharev, S., Betanzos, M., Chiang, C.-S. & Guy, H. R. The gating mechanism of the  
770 large mechanosensitive channel MscL. *Nature* **409**, 720–724 (2001).
- 771 33. Sukharev, S. I., Blount, P., Martinac, B., Blattner, F. R. & Kung, C. A large-conductance  
772 mechanosensitive channel in *E. coli* encoded by *mscL* alone. *Nature* **368**, 265–268  
773 (1994).
- 774 34. Soloperto, A. *et al.* Mechano-sensitization of mammalian neuronal networks through  
775 expression of the bacterial large-conductance mechanosensitive ion channel. *J. Cell*  
776 *Sci.* **131**, jcs210393 (2018).
- 777 35. Sato, T., Shapiro, M. G. & Tsao, D. Y. Ultrasonic Neuromodulation Causes Widespread  
778 Cortical Activation via an Indirect Auditory Mechanism. *Neuron* **98**, 1031-1041.e5  
779 (2018).
- 780 36. Guo, H. *et al.* Ultrasound Produces Extensive Brain Activation via a Cochlear Pathway.  
781 *Neuron* **98**, 1020-1030.e4 (2018).
- 782 37. Yoshimura, K., Batiza, A., Schroeder, M., Blount, P. & Kung, C. *Hydrophilicity of a single*

- 783            *residue within MscL correlates with increased channel mechanosensitivity. Biophysical*  
784            *Journal* **77**, (1999).
- 785    38.    Ye, J. *et al.* Ultrasonic Control of Neural Activity through Activation of the  
786            Mechanosensitive Channel MscL. *Nano Lett.* **18**, (2018).
- 787    39.    Dalkara, D. *et al.* In vivo-directed evolution of a new adeno-associated virus for  
788            therapeutic outer retinal gene delivery from the vitreous. *Sci. Transl. Med.* **5**, (2013).
- 789    40.    Chaffiol, A. *et al.* A New Promoter Allows Optogenetic Vision Restoration with  
790            Enhanced Sensitivity in Macaque Retina. *Mol. Ther.* **25**, 2546–2560 (2017).
- 791    41.    Menz, M. D., Oralkan, O., Khuri-Yakub, P. T. & Baccus, S. A. Precise Neural Stimulation  
792            in the Retina Using Focused Ultrasound. *J. Neurosci.* **33**, 4550–4560 (2013).
- 793    42.    Guo, H. *et al.* Ultrasound Produces Extensive Brain Activation via a Cochlear Pathway.  
794            *Neuron* **98**, 1020-1030.e4 (2018).
- 795    43.    Nelidova, D. *et al.* Restoring light sensitivity using tunable near-infrared sensors.  
796            (2020).
- 797    44.    Lee, W. *et al.* Transcranial focused ultrasound stimulation of human primary visual  
798            cortex. *Sci. Rep.* **6**, 1–12 (2016).
- 799    45.    Legon, W. *et al.* Transcranial focused ultrasound modulates the activity of primary  
800            somatosensory cortex in humans. *Nat. Neurosci.* **17**, 322–329 (2014).
- 801    46.    Folloni, D. *et al.* Manipulation of Subcortical and Deep Cortical Activity in the Primate  
802            Brain Using Transcranial Focused Ultrasound Stimulation. *Neuron* **101**, 1109-1116.e5  
803            (2019).
- 804    47.    Baron, C., Aubry, J. F., Tanter, M., Mears, S. & Fink, M. Simulation of Intracranial  
805            Acoustic Fields in Clinical Trials of Sonothrombolysis. *Ultrasound Med. Biol.* **35**, 1148–  
806            1158 (2009).
- 807    48.    Younan, Y. *et al.* Influence of the pressure field distribution in transcranial ultrasonic  
808            neurostimulation. *Med. Phys.* **40**, 1–10 (2013).

- 809 49. Jensen, R. J. & Rizzo, J. F. Effects of GABA receptor antagonists on thresholds of P23H  
810 rat retinal ganglion cells to electrical stimulation of the retina. *J. Neural Eng.* **8**, (2011).
- 811 50. Jensen, R. J. Blocking GABAC receptors increases light responsiveness of retinal  
812 ganglion cells in a rat model of retinitis pigmentosa. *Exp. Eye Res.* **105**, 21–26 (2012).
- 813 51. Sekirnjak, C. *et al.* Loss of Responses to Visual But Not Electrical Stimulation in  
814 Ganglion Cells of Rats With Severe Photoreceptor Degeneration. *J. Neurophysiol.* **102**,  
815 3260–3269 (2009).
- 816 52. Barnett, S. B. *et al.* International recommendations and guidelines for the safe use of  
817 diagnostic ultrasound in medicine. *Ultrasound Med. Biol.* **26**, 355–366 (2000).
- 818 53. Sapareto, S. A. & Dewey, W. C. Thermal dose determination in cancer therapy. *Int. J.*  
819 *Radiat. Oncol. Biol. Phys.* **10**, 787–800 (1984).
- 820 54. Greenberg, K. P., Pham, A. & Werblin, F. S. Differential Targeting of Optical  
821 Neuromodulators to Ganglion Cell Soma and Dendrites Allows Dynamic Control of  
822 Center-Surround Antagonism. *Neuron* **69**, 713–720 (2011).
- 823 55. Acland, G. M. *et al.* Long-term restoration of rod and cone vision by single dose rAAV-  
824 mediated gene transfer to the retina in a canine model of childhood blindness. *Mol.*  
825 *Ther.* **12**, 1072–1082 (2005).
- 826 56. Soloperto, A. *et al.* Mechano-sensitization of mammalian neuronal networks through  
827 expression of the bacterial large-conductance mechanosensitive ion channel. *J. Cell*  
828 *Sci.* **131**, jcs210393 (2018).
- 829 57. Choi, V. W., Asokan, A., Haberman, R. A. & Samulski, R. J. Production of Recombinant  
830 Adeno-Associated Viral Vectors for In Vitro and In Vivo Use. *Curr. Protoc. Mol. Biol.* **78**,  
831 16.25.1-16.25.24 (2007).
- 832 58. Royer, D. & Dieulesaint, E. Optical probing of the mechanical impulse response of a  
833 transducer. *Appl. Phys. Lett.* **49**, 1056–1058 (1986).
- 834 59. Yger, P. *et al.* A spike sorting toolbox for up to thousands of electrodes validated with  
835 ground truth recordings in vitro and in vivo. *Elife* **7**, (2018).

- 836 60. Akerman, C. J., Smyth, D. & Thompson, I. D. Visual Experience before Eye-Opening and  
837 the Development of the Retinogeniculate Pathway. *Neuron* **36**, 869–879 (2002).
- 838 61. Duck, Francis A., A. *Physical Properties of Tissues: A Comprehensive Reference*  
839 *Network. Ultrasound in Medicine & Biology* **36**, (Academic Press, 1990).
- 840 62. Jensen, J. A. & Svendsen, N. B. Calculation of Pressure Fields from Arbitrarily Shaped,  
841 Apodized, and Excited Ultrasound Transducers. *IEEE Trans. Ultrason. Ferroelectr. Freq.*  
842 *Control* **39**, 262–267 (1992).
- 843 63. Jensen, J. A. & Jensen, J. A. FIELD: A Program for Simulating Ultrasound Systems. *10TH*  
844 *Nord. Conf. Biomed. IMAGING, VOL. 4, Suppl. 1, PART 1351--353* **34**, 351--353 (1996).
- 845 64. ITIS Foundation DATABASE. Available at: [https://itis.swiss/virtual-population/tissue-](https://itis.swiss/virtual-population/tissue-properties/database)  
846 [properties/database](https://itis.swiss/virtual-population/tissue-properties/database). (Accessed: 17th August 2020)
- 847 65. McIntosh, R. L. & Anderson, V. A comprehensive tissue properties database provided  
848 for the thermal assessment of a human at rest. *Biophysical Reviews and Letters* **5**,  
849 129–151 (2010).
- 850 66. Szabo, T. L. *Diagnostic Ultrasound Imaging: Inside Out: Second Edition. Diagnostic*  
851 *Ultrasound Imaging: Inside Out: Second Edition* (Elsevier Inc., 2004).  
852 doi:10.1016/C2011-0-07261-7

853

854

855

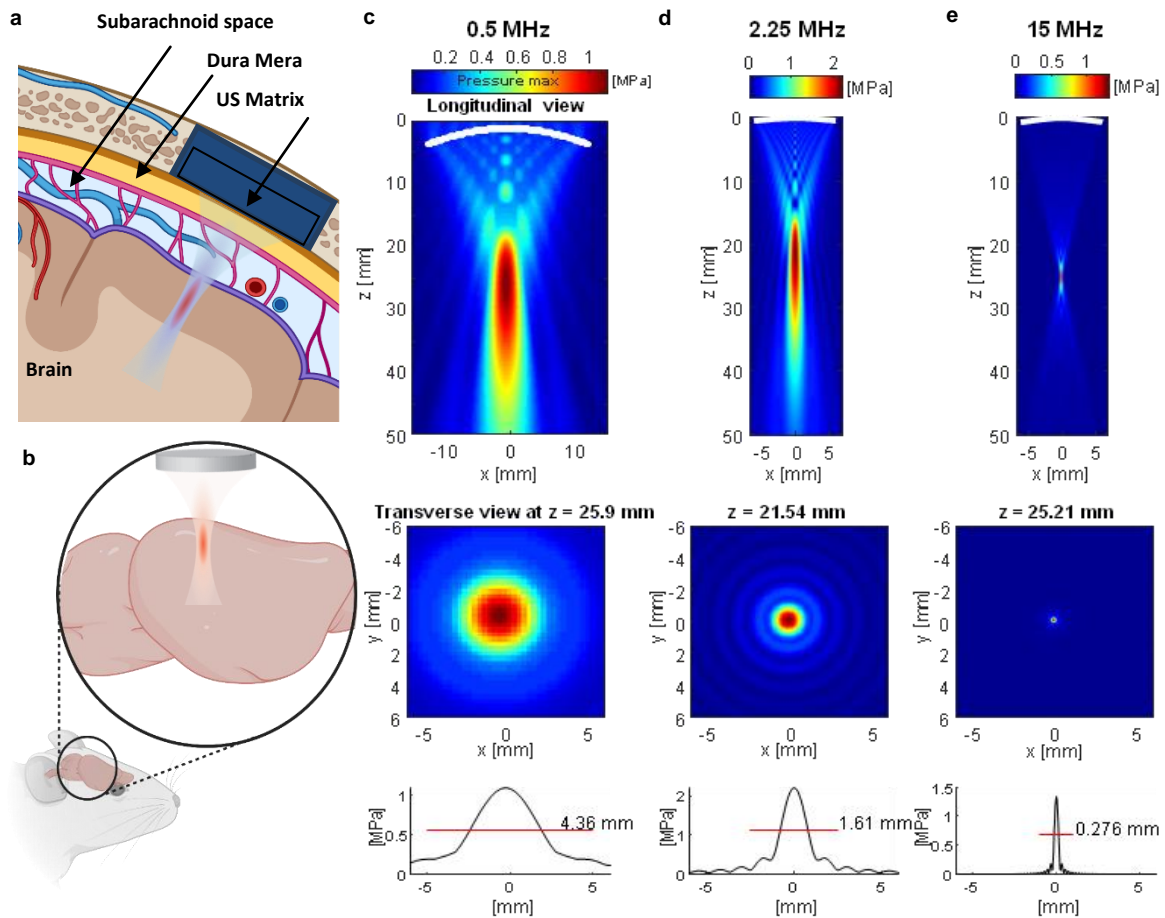

856

857

858 **Fig. 1 Sonogenetics using focused ultrasound beams for visual restoration through the intact dura mater: impact of**  
859 **ultrasonic transmission frequency.** (a) Concept of visual restoration with US matrix arrays implanted in a cranial window for  
860 localized US neuromodulation of the primary visual cortex in humans. The US beam can be adaptively focused at different  
861 locations in the V1 cortex while passing through the intact dura mater, subdural and subarachnoid spaces. (b) Proof-of-  
862 concept setup used in this study for V1 sonogenetic activation in rodents, using a high-frequency focused transducer on a  
863 craniotomized mouse. (c) Characterization of the radiated field for the 0.5 MHz transducer used in this study. (top)  
864 Longitudinal view of the maximal pressure for a monochromatic acoustic field radiated at 0.5 MHz by the 25.4 mm  $\phi$ , 31.75  
865 mm focus transducer. Pressure maximum is reached at 25.9 mm, slightly closer to the transducer than the geometric focal  
866 point, which is a documented effect<sup>66</sup>. (middle) Transverse section of the maximal pressure field at depth z = 25.9 mm.  
867 (bottom) One-dimensional profile of this transverse section giving the FWHM of the focal spot (4.36 mm at 0.5 MHz). (d)  
868 Same characterization for the 2.25 MHz 12.7mm  $\phi$  25.4 mm focus transducer. (e) Same characterization for the 15 MHz  
869 12.7mm  $\phi$  25.4 mm focus transducer. Note that the maximum pressure is reached very close to the geometric focus (25.21  
870 mm versus 25.4 mm for the geometric focus) for this configuration. The FWHM of the focal spot is 0.276 mm.

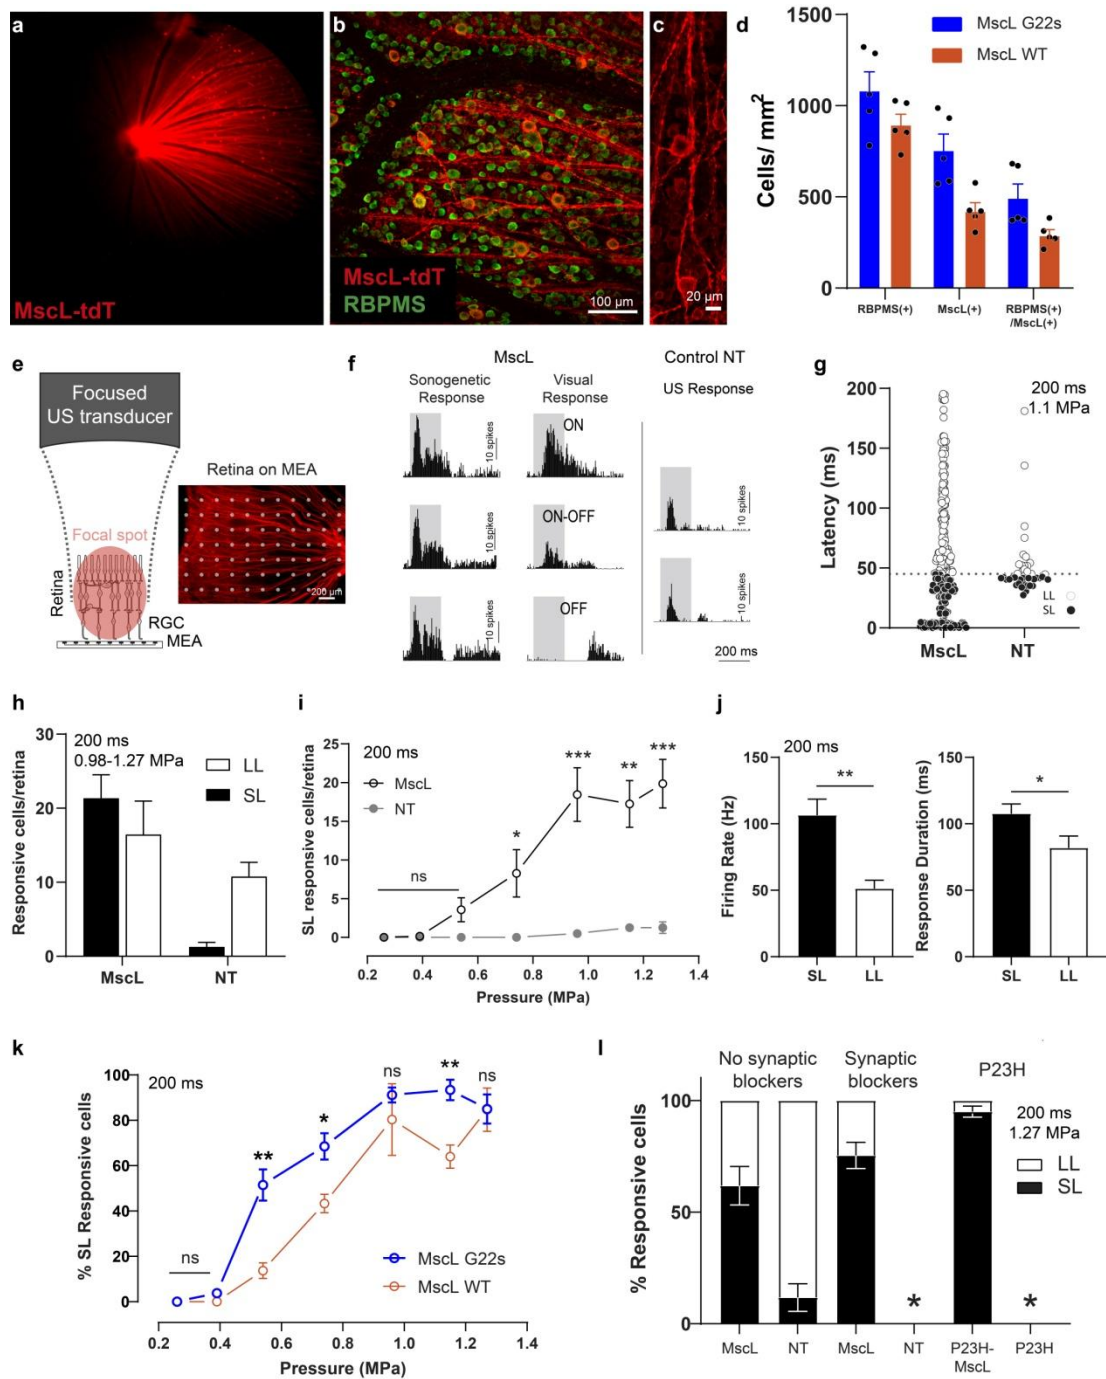

871

872

873

874

875

876

877

878

879

880

881

882

**Fig. 2 Sonogenetic therapy in retinal ganglion cells.** (a) Retinal fundus image showing MscL-tdTomato expression in the *in vivo* rat retina. (b) Representative confocal stack projection across the RGC layer of a flat-mounted retina expressing MscL-tdTomato (red) and labeled with anti-RBPMS antibody (green). (c) Magnification of a few RGCs expressing MscL-tdTomato, showing its expression at the soma and axonal levels of the membrane. (d) Density of RBPMS-positive, MscL-positive and double-labeled cells for 5 MscL G22S and 5 MscL WT retinas. (e) (Left) Schematic diagram of the experimental setup for focused US stimulation of the isolated retina on a multielectrode array (MEA). (Right) Retina expressing MscL-tdTomato on a MEA chip. White dots represent electrodes. (f) Representative peristimulus time histograms (PSTH) for RGCs, for different stimuli. (Left) PSTH of three RGCs expressing MscL, showing a short latency and a sustained response after the start of a 15 MHz US stimulus (1.27 MPa). (Middle) Corresponding PSTH of the same RGCs in response to a visual stimulus, showing typical ON, ON-OFF and OFF responses. (Right) PSTH of two RGCs from a non-transfected (NT) retina in response to a 15 MHz US stimulus (1.27 MPa), showing a response to the start and end of the stimulus. (g) RGC latencies in response to a 15



883 MHz US stimulus for MscL ( $n=300$  cells, 9 retinas) and NT ( $n=41$  cells, 4 retinas) retinas. The dotted line represents the 45  
884 ms threshold that divides cells into short latencies (SL: black dots) and long latencies (LL: white dots) cells. (h) Mean number  
885 of cells per retina responding to 15 MHz US stimuli (0.98-1.27 MPa) for MscL ( $n=9$ ) and NT ( $n=4$ ) retinas and for LL and SL  
886 cells. (i) Mean number of SL-responding RGCs per retina following stimulation with US stimuli of increasing pressure for  
887 MscL ( $n=9$ ) and NT ( $n=4$ ) retinas. \*,  $p=.0356$ , \*\*,  $p=.0010$ , \*\*\*,  $p=.0008$ , unpaired  $t$  test. (j) Mean maximum firing rate and  
888 mean response duration of SL and LL RGCs from MscL retinas in response to 15 MHz stimuli of increasing pressure (0.2-1.27  
889 MPa) ( $n=9$ , \*\*,  $p=.0017$ , \*,  $p=.0418$ , unpaired  $t$  test). (k) Percentage of SL RGC cells (normalized against the maximum  
890 number of responsive cells in the experiment) responding to US stimuli of increasing pressure for MscL WT ( $n=3$ ) and MscL  
891 G22S ( $n=6$ ) retinas. \*,  $p=.0173$ , \*\*,  $p=.0065$ , \*\*,  $p=.0083$ , unpaired  $t$  test. (l) Percentage of RGCs responding to US  
892 stimulation, for retinas in normal conditions ( $n=9$  retinas for MscL and 4 for NT), and following the application of a cocktail  
893 of synaptic blockers (CNQX-CPP-LAP4) ( $n=3$  retinas each for MscL and NT), and for P23H retinas with ( $n=3$  retinas) and  
894 without ( $n=3$  retinas) MscL expression. The ratio of SL to LL is shown for each set of conditions.

895

896

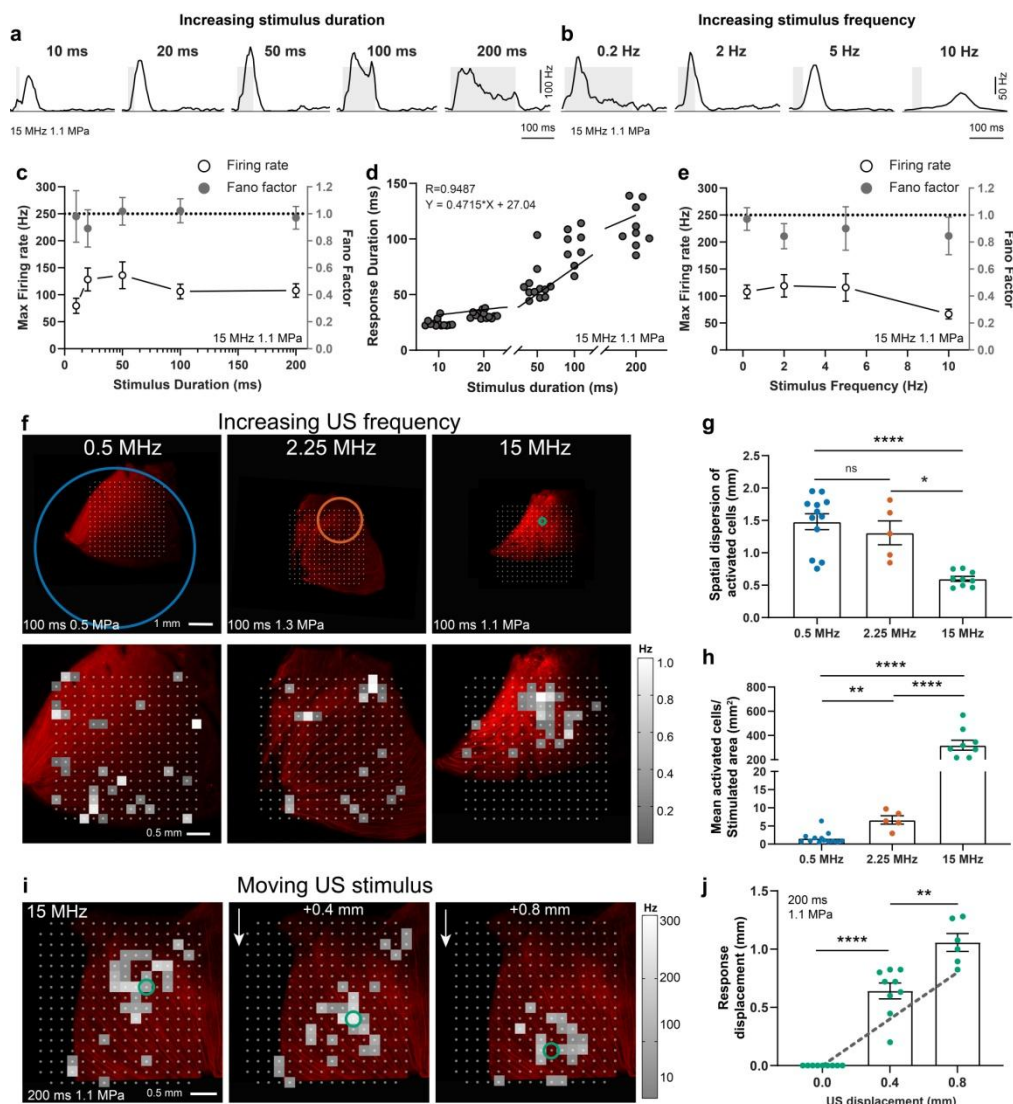

897

898 **Fig. 3 Spatiotemporal properties of sonogenetic retinal responses.** (a-b) Spike density functions of two representative  
 899 RGCs from a *MscL*-expressing retina for various 15 MHz stimulus durations (0.5 Hz stimulus repetition rate) (a) and stimulus  
 900 repetition frequencies (stimulus durations: 10, 20, 50, 200 ms) (b). (c) Mean maximum firing rate for different 15 MHz  
 901 stimulus durations and mean Fano factor values for all cells ( $n=9$  retinas, except for stimulus durations of 10 and 20 ms  
 902  $n=8$ ). (d) Correlation between response duration and stimulus duration, confirmed by the linear regression line ( $n=9$  retinas).  
 903 (e) Mean maximum firing rate for different stimulus repetition frequencies and mean Fano factor values for all cells ( $n=9$   
 904 retinas, except for stimulus frequencies of 5 and 10 Hz  $n=8$ ). (f) (Top) Retinas on a MEA chip and corresponding size of the  
 905 incident US pressure beam (circles represent the FWHM and are centered on the estimated center of response), for 0.5,  
 906 2.25 and 15 MHz. (Bottom) Corresponding activation maps following US stimulation. Each square box represents an  
 907 electrode with at least one US-activated cell. Color map representing the normalized firing rates of the cells. (g) Spatial  
 908 dispersion of activated cells calculated as the mean Euclidean distance between activated cells weighted according to  
 909 maximum firing rate and (h) ratio of the number of activated cells to the area stimulated on the MEA chip for the three US  
 910 frequencies. \*\*\*\*,  $p<.0001$ , \*\*,  $p=.0008$ , \*,  $p=.0169$ , unpaired  $t$  test.  $n=12$  retinas for 0.5 MHz (0.29-0.68 MPa),  $n=5$  retinas  
 911 for 2.25 MHz (1.11-1.62 MPa),  $n=9$  retinas for 15 MHz (1.12-1.27 MPa). (i) Heatmaps showing the activated cells of a *MscL*-  
 912 transfected retina following a relative displacement (0, +0.4 and +0.8 mm) of the 15 MHz US transducer. Each colored box  
 913 represents an activated cell; the color map shows the maximum firing rate. Circles represent the estimated center of the

914 response. (j) Relative displacement of the center of the response following displacement of the 15 MHz US transducer.  
 915 \*\*\*\*,  $p < .0001$ , \*\*,  $p = .0018$ , unpaired  $t$  test.  $n = 9$ , 9, and 6 positions for 4, 4 and 2 retinas for displacements of 0, 0.4 and 0.8  
 916 mm, respectively. The dotted gray line represents the theoretical displacement.

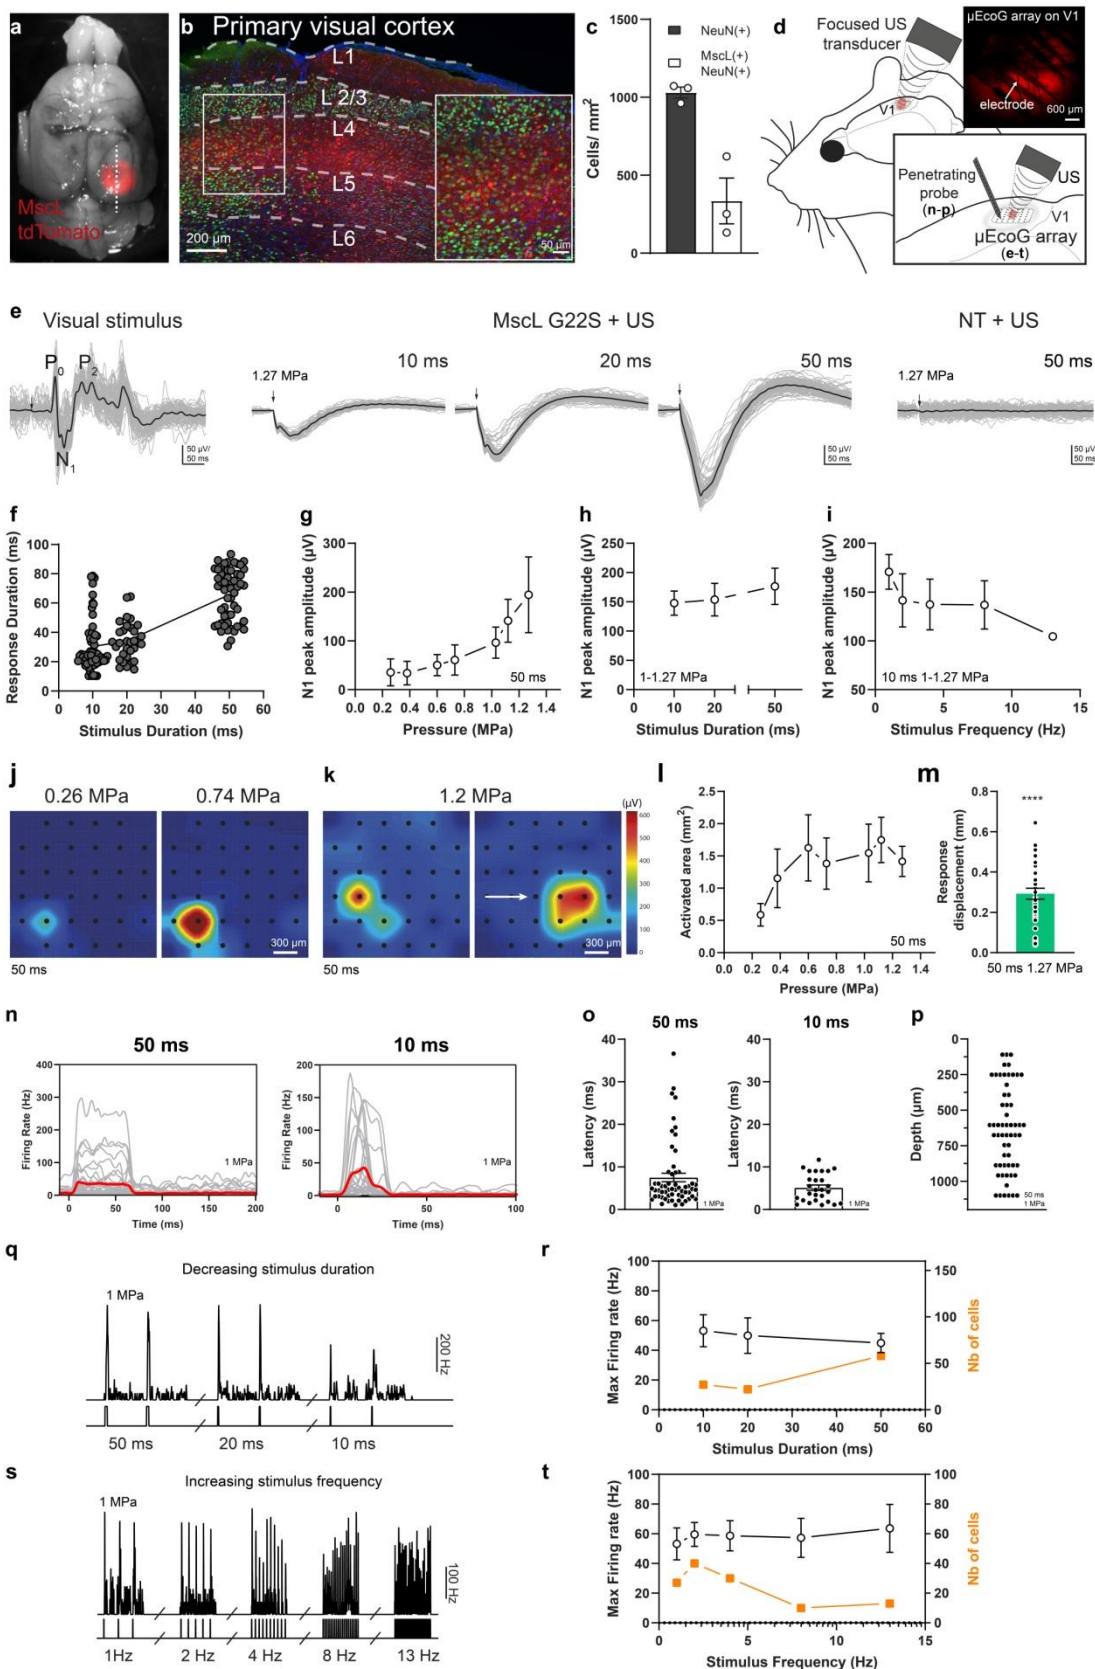

917

918 **Fig. 4 *In vivo* sonogenetic therapy in V1 cortical neurons.** (a) Image of a rat brain expressing MscL-G22S-tdTomato (red) in  
 919 V1. The dotted line illustrates the location of a sagittal slice. (b) Representative confocal stack projection of a sagittal brain  
 920 slice expressing MscL G22s-tdTomato (red) and labeled with anti-NeuN antibody (green) and DAPI (blue). The layers of V1  
 921 are delineated by dashed white lines. (Lower right) Magnification of layer 4 of V1. (c) Density of NeuN-positive, MscL-  
 922 positive and double-labeled cells for 3 brain slices. (d) Schematic diagram of the setup used for *in vivo* electrophysiological  
 923 recordings and US stimulation; (Top right)  $\mu$ EcoG electrode array placed on V1 of a MscL-transfected rat. (e) (Left)  
 924 Representative visual-evoked cortical potentials in response to a 100 ms flash. (Middle) Representative sonogenetic evoked  
 925 potentials for 15 MHz US stimuli of various durations. (Right) Representative responses of a non-transfected (NT) rat to a 15  
 926 MHz US stimulus. Black traces represent the mean evoked potential over 100 trials. Each gray trace represents one trial.  
 927 The black arrow indicates the start of the stimulus. (f) Duration of sonogenetic  $\mu$ EcoG responses for stimuli of different  
 928 durations (10 ms  $n=58$ , 20 ms  $n=32$  and, 50 ms  $n=56$  trials on 6 animals). (g) N1 peak amplitude for increasing US pressure,  
 929 (i) increasing duration and (j) frequency ( $n=6$  rats). (J) Pseudocolor activation maps for stimuli of increasing US pressure and  
 930 (k) for a horizontal displacement of the US transducer by 0.8 mm (the arrow indicates the direction of the displacement).  
 931 Each black dot represents an electrode of the electrode array. The color bar represents N1 peak amplitude in  $\mu$ V. (l) Area  
 932 activated for various US pressure values ( $n=6$  animals). (m) Displacement of the activation center relative to the previous  
 933 position following movement of the US transducer by 0.4 mm.  $p<.0001$ , one-sample  $t$  test,  $n=37$  positions on 6 animals. (n)  
 934 Spike density functions (SDF) of 58 and 27 neurons following US stimulation for 50 and 10 ms, respectively, for MscL rats.  
 935 (o) Response latencies following 50 and 10 ms US stimuli (50 ms  $n=58$  cells, 7 rats; 10 ms,  $n=27$  cells, 5 rats). (p) Depth of  
 936 US-responding cells ( $n=58$ ) in MscL-expressing rats ( $n=7$ ). (q) Instantaneous SDF of responses to US stimuli of different  
 937 durations (1 Hz stimulus repetition frequency). (r) Maximum firing rates and numbers of activated neurons upon US  
 938 stimulations of different durations (US pressure: 1 MPa). (s) Instantaneous SDF of responses to US stimuli of different  
 939 repetition frequencies (10 ms stimulus duration). (t) Maximum firing rate and number of activated neurons upon US  
 940 stimulation at different stimulus repetition frequencies (10 ms, 1MPa).

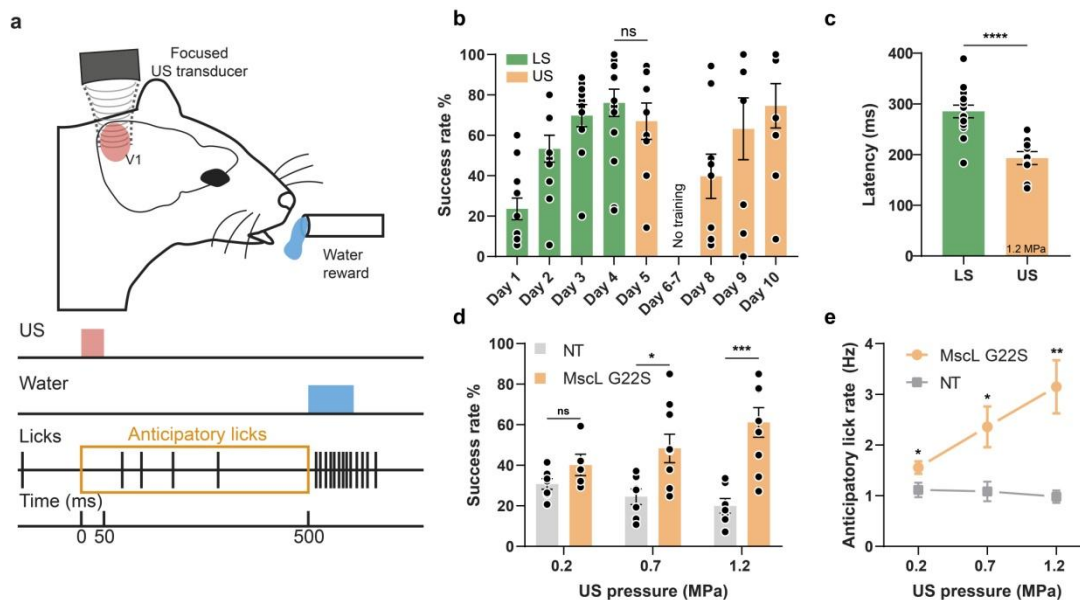

941 **Fig. 5 Behavioural response induced by sonogenetic activation of the V1 cortex in mice following associative visual**  
 942 **training.** (a) Schematic diagram of the behavioral task performed by mice. Water-restricted animals trained in an  
 943 associative learning paradigm for light stimulation with a water reward are subjected to US stimulation of VA at 15 MHz. A  
 944 trial is considered successful if the animal performs at least one anticipatory lick within the 500 ms time lag between  
 945 stimulus onset and water reward. (b) Mean rates of successful trials for 4 days of training during learning of the association  
 946 between light stimulation (50 ms) and water reward (LS green) followed by the US stimulation (US orange) (50 ms 1.2 MPa,  
 947  $ns$ ,  $p=.4311$ , unpaired  $t$  test). (c) Time to first lick after light (50 ms) and US stimulation (50 ms, 1.2 MPa) (\*\*\*\*,  $p<.0001$ ,  
 948 unpaired  $t$  test). (d) Mean rate of successful trials over 4 days of US stimulation for non-transfected (NT) and MscL-G22S  
 949

950 transfected mice, following 50 ms of US stimulation at increasing US pressure (ns,  $p=0.0751$ , \*,  $p=0.0114$ , \*\*\*,  $p=0.0006$ ,  
951 unpaired  $t$  test, for 0.2, 0.7 and 1.2 MPa, respectively). (e) Anticipatory lick rates for NT and MscL-G22S transfected mice at  
952 increasing US pressures (\*,  $p=0.0424$ , \*,  $p=0.0150$ , \*\*,  $p=0.0031$ , unpaired  $t$  test, for 0.2, 0.7 and 1.2 MPa, respectively).

953

954 **Extended data figures:**

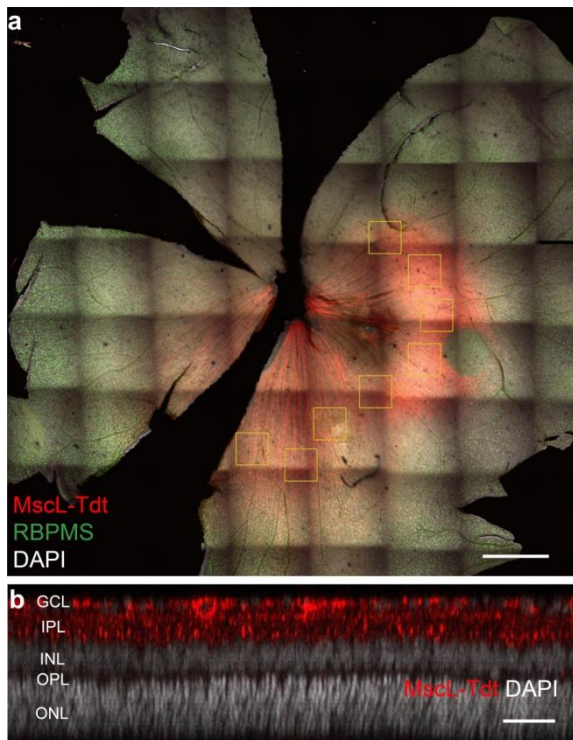

955

956

957

958

959

**Fig. E1 Retinal expression of MscL.** (a) Whole-mount retina expressing MscL WT (red) and labeled with the RGC-specific anti-RBPMS antibody (green), with DAPI staining of the nucleus (white). Yellow boxes represent the 8 zones selected for the counting of MscL- and RBPMS-positive cells. (b) Optical section of a confocal stack showing MscL expression limited to the ganglion cell layer. The scale bars represent 1 mm in (a), 50  $\mu$ m in (b).

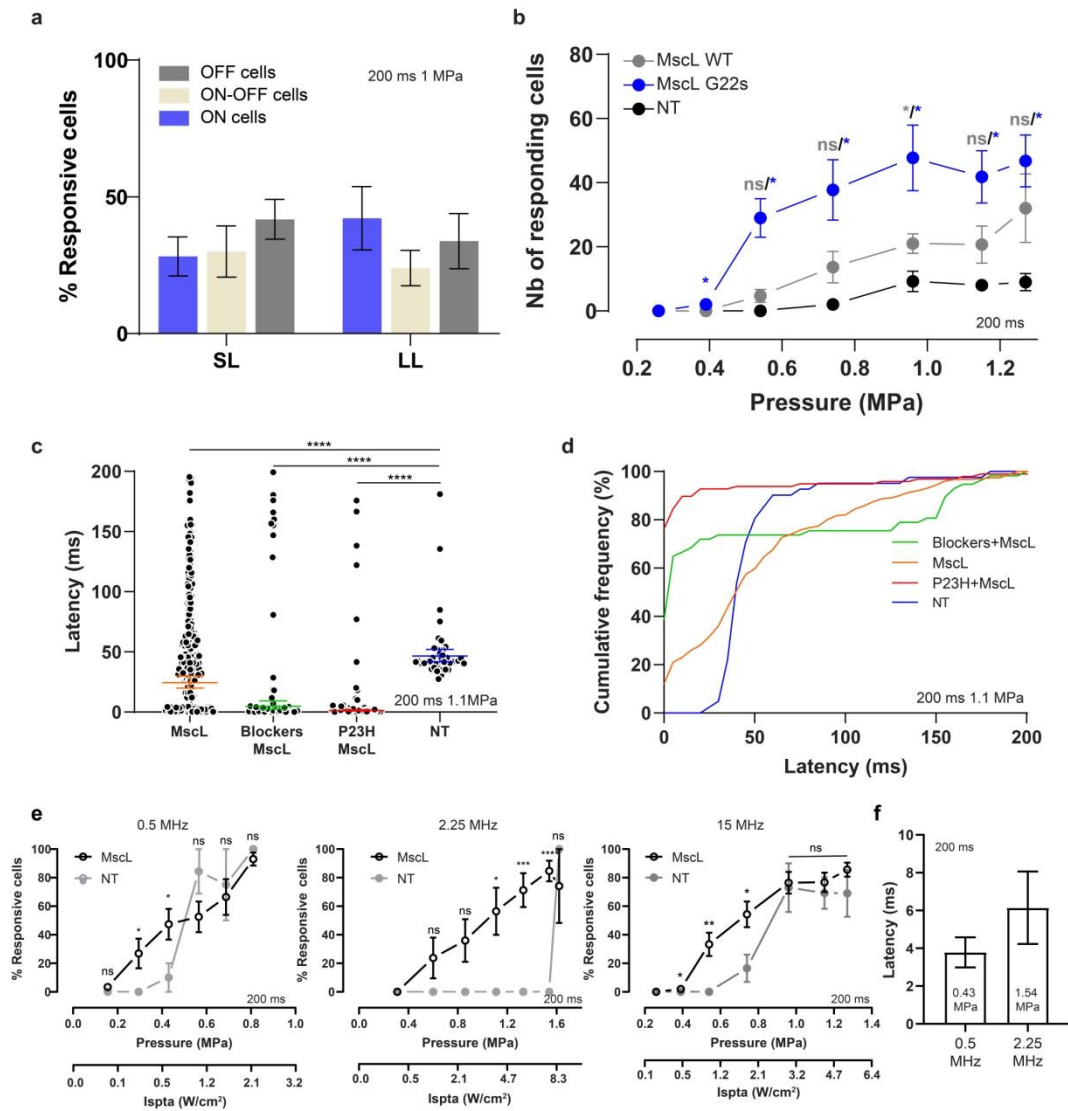

960

961 **Fig.E2 Retinal sonogenetic response characteristics for US stimuli of different frequencies.** (a) Distribution of the different  
 962 RGC cell types (ON, OFF, ON-OFF) among short (SL) and long latency (LL) responses in retinas ( $n=9$ ) expressing MscL (WT  
 963 and G22s form) following a 15 MHz US stimulus. (b) Numbers of RGCs responding to a 15 MHz stimulus of increasing  
 964 acoustic pressure for MscL WT ( $n=3$ ), MscL G22s ( $n=5$ ) and NT ( $n=4$ ) retinas (0.39 MPa: \*,  $p=0.0163$ ; ns, 0.54 MPa:  $p=0.1480$ \*,  
 965  $p=0.0168$ ; 0.74 MPa: ns,  $p=0.1334$ \*,  $p=0.312$ ; 0.96 MPa: \*,  $p=0.0462$ \*,  $p=0.0279$ ; 1.15 MPa: ns,  $p=0.1617$ /\*,  $p=0.0145$ ; 1.27 MPa: ns,  
 966  $p=0.1580$ /\*,  $p=0.0144$ ; unpaired  $t$  test between MscL WT and NT in gray and MscL-G22s and NT in blue). (c) Scatter plots and  
 967 geometric means of RGC latencies in response to a 15 MHz US stimulus for MscL ( $n=300$  cells), Blockers+MscL ( $n=57$  cells),  
 968 P23H+MscL ( $n=97$  cells), and NT ( $n=41$  cells) retinas (\*\*\*\*,  $p<0.0001$ , unpaired  $t$ -test on log-transformed values). (d)  
 969 Cumulative frequency distribution of RGC latencies for MscL, Blockers+MscL, P23H+MscL, and NT retinas. (e) Percentage of  
 970 cells responding to US stimuli (normalized against the maximum number of responsive cells in the experiment) of increasing  
 971 acoustic pressure for 0.5 MHz (ns,  $p=0.1661$ /\*,  $p=0.0292$ ; \*,  $p=0.0260$ ; ns,  $p=0.8628$ ; ns,  $p=0.1316$ ; ns,  $p=0.7731$ ; unpaired  $t$  test),  
 972 2.25 MHz (ns,  $p=0.1474$ ; ns,  $p=0.0522$ ; \*,  $p=0.0140$ ; \*\*\*,  $p=0.0005$ ; \*\*\*\*,  $p<0.0001$ ; ns,  $p=0.5000$ ; unpaired  $t$  test) and 15 MHz (\*,  
 973  $p=0.0382$ /\*,  $p=0.0065$ ; \*,  $p=0.0218$ ; ns,  $p=0.8628$ ; ns,  $p=0.5859$ ; ns,  $p=0.4223$ ; unpaired  $t$  test) US. The lower x axis represents the  
 974 corresponding acoustic intensity (Ispta). (f) Mean response latencies of SL cells for 0.5 and 2.25 MHz ( $n=9$  and 8 retinas).

975

976

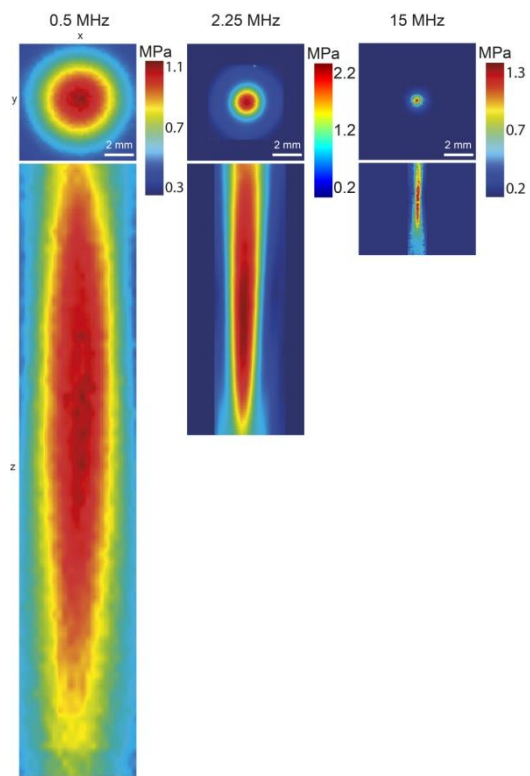

977

978 **Fig. E3 Experimentally measured US pressure fields near the focus for 0.5, 2.25 and 15 MHz focused transducers,**  
979 **measured in water.** Color-coded pressure maps in the xy and xz planes, for 0.5, 2.25 and 15 MHz.

980

981



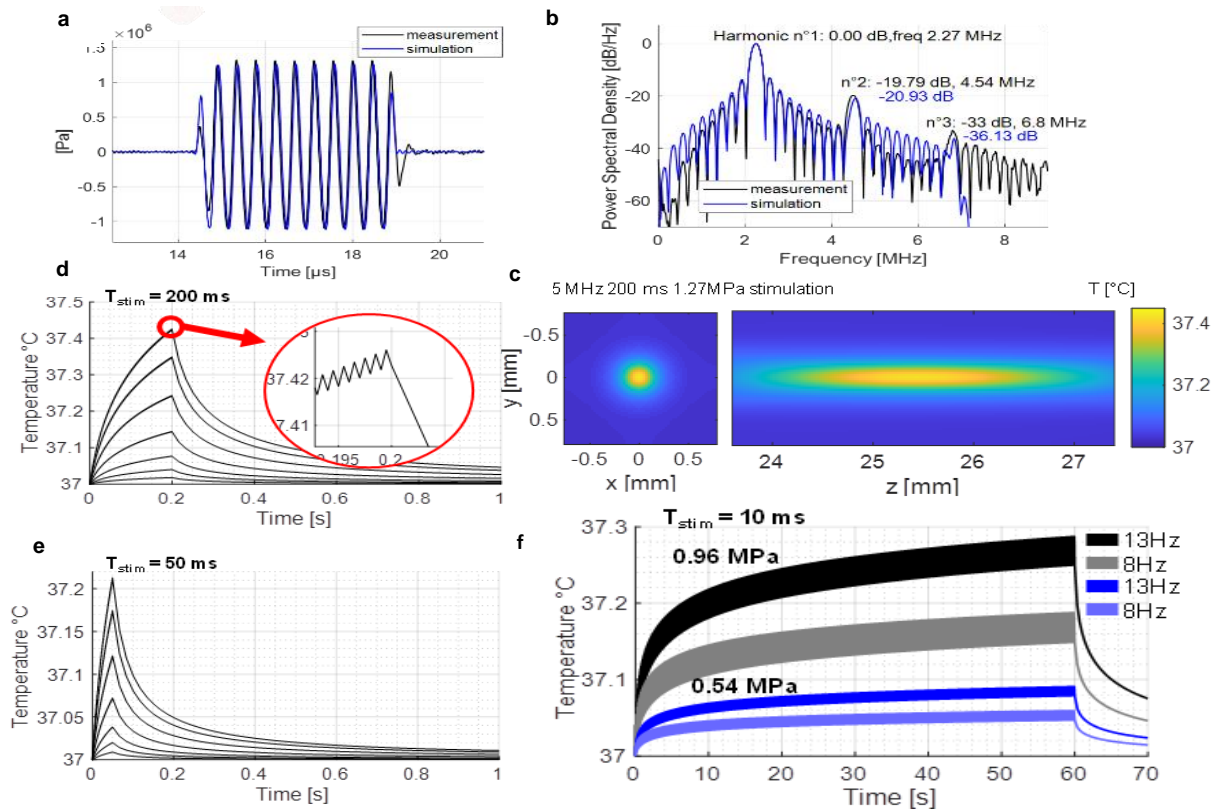

982  
983  
984  
985  
986  
987  
988  
989  
990  
991  
992  
993  
994  
995  
996  
997  
998  
999

**Fig. E4 Simulated acoustic fields and temperature increases.** (a) Comparison between a water tank measurement at the focus with a calibrated hydrophone (black) obtained with the 2.25 MHz transducer and reaching -1.11 MPa peak negative pressure, and a simulated waveform at the focus (blue) reaching the same negative pressure. The two waveforms match very well (0.42% error) ensuring a good match between our simulation setup and physical parameters. (b) Power spectral density of the measured (black) and simulated (blue) waveforms, showing that simulations can be used to estimate the importance of non-linear propagation. A second harmonic 20 dB below the fundamental indicates a factor of 100 in terms of energy, meaning that absorption can be calculated in a linear approximation. (c-f) Thermal simulations are performed in a two-fold process corresponding to a worst-case scenario (see methods): propagation in a water medium, and thermal absorption in a brain-mimicking medium. (h) 3D temperature map at the end of a 200 ms stimulation (at 15 MHz and 1.27 MPa). (d) Temperature rise at the focus for a 15 MHz 200 ms stimulation with the 7 pressures used in Fig. 1I (0.26, 0.39, 0.54, 0.74, 0.96, 1.15, 1.27 MPa). A zoom on the increasing curve reveals the fluctuations due to the 1 kHz on-off cycles. (e) Temperature rise at the focus for a 15 MHz 50 ms stimulation with the same 7 pressures. (f) Temperature rise at the focus for 15 MHz 10ms stimulations (1 kHz modulation) at a repetition rate of 8 Hz and 13 Hz (used in figure 3o), for focus pressures of 0.96 MPa and 0.54 MPa.

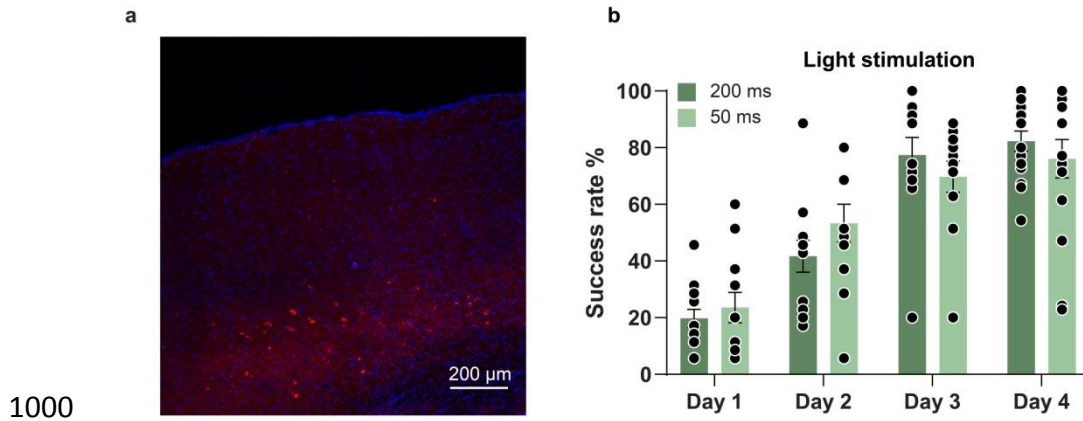

1000

1001 **Fig. E1 MscL G22S expression and light-associative training in mice.** (a) Representative confocal stack projection of a  
1002 sagittal brain slice expressing MscL G22s-tdTomato (red) and labeled with DAPI (blue). (b) Head-fixed and water-restricted  
1003 mice were trained for four days to respond to a full-field stimulation of one eye (200 and 50 ms long) that preceding a  
1004 water reward. Mice respond by licking before (anticipation — successful trial) or after the appearance of water. The success  
1005 rate increased progressively and mice had learnt the task (upon 50 ms and 200 ms light stimulation) after four days of  
1006 training.
